# Supplementary material
Source: PubMed Central journal article supplement (PMC3376233)
Supplement: NIHMS376884-supplement-01.pdf [file NIHMS376884-supplement-01.pdf]

| <b>Authoritative Name</b>  | <b>Synonym</b>          | <b>Category</b> |
|----------------------------|-------------------------|-----------------|
| abstract thinking          | abstract thinking       | function        |
| acoustic processing        | acoustic processing     | function        |
| action imitation           | action imitation        | function        |
| action initiation          | action initiation       | function        |
| action observation         | action observation      | function        |
| action selection           | action selection        | function        |
| affect perception          | affect perception       | function        |
| affect recognition         | affect recognition      | function        |
| altruism                   | altruistic              | function        |
| analogical problem solving | analogy problem solving | function        |
| analogical reasoning       | analogy reasoning       | function        |
| anticipation               | anticipatory            | function        |
| antisaccade                | antisaccades            | function        |
| antisaccade                | antisaccading           | function        |
| apparent motion            | apparent motion         | function        |
| apparent movement          | apparent movement       | function        |
| apperception               | apperceptive            | function        |
| appetitive motivation      | appetitive motivation   | function        |
| arousal                    | arousal                 | function        |
| articulation               | articulation            | function        |
| articulatory loop          | articulatory loop       | function        |
| association learning       | associative learning    | function        |
| attentional blink          | attentional blink       | function        |
| attentional capacity       | attention capacity      | function        |
| attentional effort         | attentional effort      | function        |
| attentional resources      | attentional resources   | function        |
| attentional shifting       | attention shifting      | function        |
| attentional shifting       | attention shifts        | function        |
| attentional shifting       | attentional shift       | function        |
| attentional shifting       | attentional shifts      | function        |
| attentional span           | attention span          | function        |
| audition                   | audition                | function        |
| auditory attention         | auditory attention      | function        |
| auditory learning          | auditory learning       | function        |

|                           |                           |          |
|---------------------------|---------------------------|----------|
| auditory localization     | auditory localization     | function |
| auditory memory           | auditory memories         | function |
| auditory perception       | auditory perception       | function |
| auditory working memory   | auditory working memories | function |
| autobiographical memory   | autobiographical memories | function |
| autobiographical recall   | autobiographical recall   | function |
| automaticity              | automaticity              | function |
| aversive learning         | aversive learning         | function |
| awareness                 | awareness                 | function |
| backward digit span       | backward digit span       | function |
| backward masking          | backward masking          | function |
| behavioral inhibition     | behavioural inhibition    | function |
| categorical perception    | categorical perception    | function |
| category learning         | category learning         | function |
| causal inference          | causal inference          | function |
| central executive         | central executive         | function |
| classical conditioning    | classical conditioning    | function |
| cognition                 | cognition                 | function |
| cognitive control         | cognitive control         | function |
| cognitive development     | cognitive development     | function |
| cognitive dissonance      | cognitive dissonance      | function |
| cognitive effort          | cognitive effort          | function |
| cognitive load            | cognitive load            | function |
| cognitive map             | cognitive maps            | function |
| color discrimination      | colour discrimination     | function |
| color perception          | colour perception         | function |
| concept learning          | concept learning          | function |
| consciousness             | consciousness             | function |
| context memory            | context memories          | function |
| contextual knowledge      | contextual knowledge      | function |
| convergent thinking       | convergent thinking       | function |
| creativity                | creativity                | function |
| crystallized intelligence | crystallized intelligence | function |
| deception                 | decieving                 | function |
| decision making           | decision making           | function |

|                            |                            |          |
|----------------------------|----------------------------|----------|
| declarative knowledge      | declarative knowledge      | function |
| declarative memory         | declarative memories       | function |
| deductive inference        | deductive inference        | function |
| deductive reasoning        | deductive reasoning        | function |
| delayed match to sample    | delayed match to sample    | function |
| delayed nonmatch to sample | delayed nonmatch to sample | function |
| delayed recall             | delayed recall             | function |
| delayed recognition        | delayed recognition        | function |
| digit span                 | digit span                 | function |
| divided attention          | divided attention          | function |
| edge detection             | edge detection             | function |
| emotional bonding          | emotional bonding          | function |
| emotional intelligence     | emotional intelligence     | function |
| emotional memory           | emotion memories           | function |
| emotional memory           | emotion memory             | function |
| emotional memory           | emotional memories         | function |
| emotional perception       | emotion perception         | function |
| emotional perception       | emotional perceptions      | function |
| emotional perception       | emotion perceptions        | function |
| emotional recognition      | emotion recognition        | function |
| emotional suppression      | emotion suppression        | function |
| empathy                    | empathic                   | function |
| episodic buffer            | episodic buffer            | function |
| episodic learning          | episodic learning          | function |
| episodic memory            | episodic memories          | function |
| episodic recall            | episodic recall            | function |
| error detection            | error detection            | function |
| executive control          | executive control          | function |
| executive function         | executive functions        | function |
| explicit knowledge         | explicit knowledge         | function |
| explicit learning          | explicit learning          | function |
| explicit memory            | explicit memories          | function |
| eye contact                | eye contact                | function |
| eye movement               | eye movements              | function |
| face perception            | face perception            | function |

|                      |                      |          |
|----------------------|----------------------|----------|
| face recognition     | face recognition     | function |
| facial expression    | facial expression    | function |
| false memory         | false memory         | function |
| familiarity          | familiarity          | function |
| fear                 | fear                 | function |
| feature detection    | feature detection    | function |
| feature extraction   | feature extraction   | function |
| figure ground        | figure ground        | function |
| fixation             | fixation             | function |
| fluid intelligence   | fluid intelligence   | function |
| focused attention    | focused attention    | function |
| forgetting           | forgetting           | function |
| form perception      | form perceptions     | function |
| go/no-go             | go/no-go             | function |
| goal formation       | goal formation       | function |
| goal maintenance     | goal maintenance     | function |
| gustation            | gustation            | function |
| gustatory learning   | gustatory learning   | function |
| gustatory memory     | gustatory memories   | function |
| gustatory perception | gustatory perception | function |
| habit learning       | habit learning       | function |
| habit memory         | habit memories       | function |
| hallucination        | hallucinations       | function |
| hallucination        | hallucinatory        | function |
| handedness           | handedness           | function |
| happiness            | happy                | function |
| hedonism             | hedonic              | function |
| humiliation          | humiliate            | function |
| humiliation          | humiliated           | function |
| humor                | comedy               | function |
| iconic memory        | iconic memories      | function |
| implicit knowledge   | implicit knowledge   | function |
| implicit memory      | implicit memories    | function |
| imprinting           | imprinting           | function |
| inattention          | inattentive          | function |

|                        |                        |          |
|------------------------|------------------------|----------|
| inductive inference    | inductive inference    | function |
| inductive reasoning    | inductive reasoning    | function |
| inhibition of return   | inhibition of return   | function |
| intelligence           | intelligence           | function |
| intentional forgetting | intentional forgetting | function |
| internal speech        | internal speech        | function |
| intrinsic motivation   | intrinsic motivation   | function |
| introspection          | introspective          | function |
| involuntary attention  | involuntary attention  | function |
| Iowa Gambling          | Iowa Gambling          | function |
| kinesthesia            | kinesthetic            | function |
| language acquisition   | language acquisition   | function |
| language comprehension | language comprehension | function |
| language learning      | language learning      | function |
| language processing    | language processing    | function |
| language production    | language production    | function |
| letter fluency         | letter fluency         | function |
| letter naming          | letter naming          | function |
| lexical encoding       | lexical encoding       | function |
| lexical processing     | lexical processing     | function |
| lexical retrieval      | lexical retrieval      | function |
| logical reasoning      | logical reasoning      | function |
| logical thinking       | logical thinking       | function |
| long term memory       | long term memories     | function |
| loss aversion          | loss aversion          | function |
| lying                  | lying                  | function |
| mathematical reasoning | mathematical reasoning | function |
| memory acquisition     | memory acquisition     | function |
| memory consolidation   | memory consolidation   | function |
| memory retrieval       | memory retrieval       | function |
| memory storage         | memory storage         | function |
| memory trace           | memory traces          | function |
| mental arithmetic      | mental math            | function |
| mental imagery         | mental imagery         | function |
| mental representation  | mental representation  | function |

|                             |                             |          |
|-----------------------------|-----------------------------|----------|
| mental rotation             | mental rotation             | function |
| metacognition               | metacognitive               | function |
| metamemory                  | metamemories                | function |
| metaphor                    | metaphors                   | function |
| morphological processing    | morphological processing    | function |
| motor control               | motor control               | function |
| motor learning              | motor learning              | function |
| motor planning              | motor planning              | function |
| motor sequence learning     | motor sequence learning     | function |
| movement planning           | movement planning           | function |
| music comprehension         | music comprehension         | function |
| n-back                      | n-back                      | function |
| nondeclarative knowledge    | nondeclarative knowledge    | function |
| nondeclarative memory       | nondeclarative memories     | function |
| novelty detection           | novelty detection           | function |
| novelty processing          | novelty processing          | function |
| object categorization       | object categorization       | function |
| object identification       | object identification       | function |
| object orientation          | object orientation          | function |
| object perception           | object perception           | function |
| object recognition          | object recognition          | function |
| oddball                     | oddball                     | function |
| olfaction                   | olfaction                   | function |
| pain                        | pain                        | function |
| passive attention           | passive attention           | function |
| passive listening           | passive listening           | function |
| passive viewing             | passive viewing             | function |
| Pavlovian conditioning      | Pavlovian conditioning      | function |
| perceptual binding          | perceptual binding          | function |
| perceptual categorization   | perceptual categorization   | function |
| perceptual learning         | perceptual learning         | function |
| performance monitoring      | performance monitoring      | function |
| phonological buffer         | phonological buffer         | function |
| phonological discrimination | phonological discrimination | function |
| phonological encoding       | phonological encoding       | function |

|                             |                             |          |
|-----------------------------|-----------------------------|----------|
| phonological loop           | phonological loop           | function |
| phonological retrieval      | phonological retrieval      | function |
| phonological working memory | phonological working memory | function |
| picture naming              | picture naming              | function |
| Posner cueing               | Posner cueing               | function |
| preconscious perception     | preconscious perception     | function |
| procedural knowledge        | procedural knowledge        | function |
| procedural learning         | procedural learning         | function |
| procedural memory           | procedural memories         | function |
| procedural rule             | procedural rules            | function |
| processing capacity         | processing capacity         | function |
| proprioception              | proprioception              | function |
| prospective memory          | prospective memories        | function |
| recognition memory          | recognition memories        | function |
| reconsolidation             | reconsolidation             | function |
| relational learning         | relational learning         | function |
| repressed memory            | repressed memories          | function |
| reversal learning           | reversal learning           | function |
| reward                      | reward                      | function |
| rhyme                       | rhyming                     | function |
| rhythm                      | rhythm                      | function |
| risk seeking                | risk seeking                | function |
| rule learning               | rule learning               | function |
| saccade                     | saccades                    | function |
| saccade                     | saccadic                    | function |
| saccade                     | saccading                   | function |
| selective attention         | selective attention         | function |
| self monitoring             | self monitoring             | function |
| semantic association        | semantic association        | function |
| semantic knowledge          | semantic knowledge          | function |
| semantic memory             | semantic memories           | function |
| semantic processing         | semantic processes          | function |
| semantic working memory     | semantic working memory     | function |
| sentence completion         | sentence completion         | function |
| sentence comprehension      | sentence comprehension      | function |





|                                       |                            |          |
|---------------------------------------|----------------------------|----------|
| trail making                          | trail making               | function |
| traumatic memory                      | traumatic memories         | function |
| uncertainty                           | uncertainty                | function |
| verbal memory                         | verbal memories            | function |
| visual attention                      | visual attention           | function |
| visual buffer                         | visual buffer              | function |
| visual imagery                        | visual imagery             | function |
| visual masking                        | visual masking             | function |
| visual memory                         | visual memories            | function |
| visual perception                     | visual perception          | function |
| visual search                         | visual search              | function |
| visual working memory                 | visual working memory      | function |
| visuospatial cueing                   | visuospatial cue           | function |
| visuospatial sketch pad               | visuospatial sketch pad    | function |
| Wisconsin card sorting                | Wisconsin card sort        | function |
| word comprehension                    | word comprehension         | function |
| word identification                   | word identification        | function |
| word production                       | word production            | function |
| word recognition                      | word recognition           | function |
| word repetition                       | word repetition            | function |
| working memory                        | working memories           | function |
| working memory retrieval              | working memory retrieval   | function |
| working memory storage                | working memory storage     | function |
| diffusion tensor imaging              | diffusion tensor           | method   |
| diffusion tensor imaging              | diffusion weighted         | method   |
| diffusion tensor imaging              | diffusion weighted imaging | method   |
| diffusion tensor imaging              | DTI                        | method   |
| diffusion tensor imaging              | fractional anisotropy      | method   |
| diffusion tensor imaging              | tractography               | method   |
| electroencephalography                | ECoG                       | method   |
| electroencephalography                | EEG                        | method   |
| electroencephalography                | electroencephalogram       | method   |
| electroencephalography                | electroencephalographic    | method   |
| electroencephalography                | iEEG                       | method   |
| functional magnetic resonance imaging | fMRI                       | method   |

|                                          |                                            |           |
|------------------------------------------|--------------------------------------------|-----------|
| functional magnetic resonance imaging    | functional magnetic resonance              | method    |
| magnetoencephalography                   | magnetoencephalogram                       | method    |
| magnetoencephalography                   | magnetoencephalographic                    | method    |
| magnetoencephalography                   | MEG                                        | method    |
| positron emission tomography             | PET                                        | method    |
| positron emission tomography             | single photon emission computed tomography | method    |
| positron emission tomography             | SPECT                                      | method    |
| single-unit recording                    | LFP                                        | method    |
| single-unit recording                    | local field potential                      | method    |
| single-unit recording                    | local field potentials                     | method    |
| single-unit recording                    | multi-unit recording                       | method    |
| single-unit recording                    | single-unit                                | method    |
| transcranial magnetic stimulation        | TDCS                                       | method    |
| transcranial magnetic stimulation        | TMS                                        | method    |
| transcranial magnetic stimulation        | transcranial direct current stimulation    | method    |
| transcranial magnetic stimulation        | transcranial magnetic                      | method    |
| addiction                                | addiction                                  | pathology |
| agnosia                                  | agnosic                                    | pathology |
| Alzheimer's disease                      | Alzheimer's                                | pathology |
| anhedonia                                | anhedonic                                  | pathology |
| anorexia                                 | anorexic                                   | pathology |
| antisocial personality disorder          | antisocial personality                     | pathology |
| anxiety                                  | anxiety                                    | pathology |
| aphasia                                  | aphasic                                    | pathology |
| apraxia                                  | apraxic                                    | pathology |
| ataxia                                   | ataxic                                     | pathology |
| attention deficit hyperactivity disorder | ADD                                        | pathology |
| attention deficit hyperactivity disorder | ADHD                                       | pathology |
| attention deficit hyperactivity disorder | attention deficit disorder                 | pathology |
| autism                                   | autistic                                   | pathology |
| Bell's palsy                             | Bell's palsy                               | pathology |
| bipolar disorder                         | manic depression                           | pathology |
| bipolar disorder                         | manic depressive                           | pathology |
| borderline personality disorder          | borderline personality                     | pathology |
| Broca's aphasia                          | Broca's aphasic                            | pathology |

|                                |                               |           |
|--------------------------------|-------------------------------|-----------|
| bulimia                        | bulimic                       | pathology |
| coma                           | comatose                      | pathology |
| Creutzfeldt-Jakob disease      | Creutzfeldt-Jakob             | pathology |
| Dandy-Walker syndrome          | Dandy-Walker                  | pathology |
| dementia                       | demented                      | pathology |
| depression                     | depressive                    | pathology |
| dysgraphia                     | dysgraphic                    | pathology |
| dyslexia                       | dyslexic                      | pathology |
| dyspraxia                      | dyspraxic                     | pathology |
| epilepsy                       | epileptic                     | pathology |
| herpes zoster                  | herpes zoster                 | pathology |
| Huntington's disease           | Huntington's                  | pathology |
| Kluver-Bucy syndrome           | Kluver-Bucy                   | pathology |
| Lou Gehrig's disease           | amyotrophic lateral sclerosis | pathology |
| migraine                       | migraines                     | pathology |
| multiple sclerosis             | multiple sclerosis            | pathology |
| narcolepsy                     | narcoleptic                   | pathology |
| obsessive compulsive disorder  | obsessive compulsive          | pathology |
| obsessive compulsive disorder  | OCD                           | pathology |
| panic disorder                 | panic disorder                | pathology |
| Parkinson's disease            | Parkinson's                   | pathology |
| post-traumatic stress disorder | post traumatic stress         | pathology |
| post-traumatic stress disorder | post-traumatic stress         | pathology |
| post-traumatic stress disorder | PTSD                          | pathology |
| prosopagnosia                  | prosopagnosic                 | pathology |
| schizophrenia                  | schizophrenic                 | pathology |
| social phobia                  | social phobic                 | pathology |
| stress                         | stress                        | pathology |
| stroke                         | strokes                       | pathology |
| Tay-Sachs disease              | Tay-Sachs                     | pathology |
| Tourette syndrome              | Tourette's                    | pathology |
| traumatic brain injury         | TBI                           | pathology |
| Wernicke-Korsakoff syndrome    | Wernicke-Korsakoff            | pathology |
| Wernicke's aphasia             | Wernicke's aphasic            | pathology |
| abducens nucleus               | abducens nerve nucleus        | structure |

|                            |                                         |           |
|----------------------------|-----------------------------------------|-----------|
| abducens nucleus           | abducens nuclei                         | structure |
| abducens nucleus           | Nucleus abducens                        | structure |
| abducens nucleus           | Nucleus nervi abducentis                | structure |
| abducens nucleus           | Nucleus nervi abducentis                | structure |
| abducens nucleus           | nucleus of abducens nerve               | structure |
| amygdala                   | amygdalae                               | structure |
| amygdala                   | amygdalar                               | structure |
| amygdala                   | amygdaloid body                         | structure |
| amygdala                   | amygdaloid nuclear complex              | structure |
| amygdala                   | amygdaloid nuclear groups               | structure |
| amygdala                   | amygdaloid nucleus                      | structure |
| amygdala                   | archistriatum                           | structure |
| amygdala                   | Corpus amygdalae                        | structure |
| amygdala                   | Corpus amygdaloideum                    | structure |
| amygdala                   | nucleus amygdalae                       | structure |
| angular gyrus              | angular gyri                            | structure |
| angular gyrus              | angular gyrus                           | structure |
| angular gyrus              | Gyrus angularis                         | structure |
| angular gyrus              | Gyrus parietalis inferior               | structure |
| angular gyrus              | middle part of inferior parietal lobule | structure |
| angular gyrus              | prelunate gyrus                         | structure |
| angular gyrus              | preoccipital gyrus                      | structure |
| anterior cingulate gyrus   | anterior cingulate                      | structure |
| anterior cingulate gyrus   | anterior cingulate gyri                 | structure |
| anterior cingulate gyrus   | anterior cingulate gyrus                | structure |
| anterior cingulate gyrus   | Cortex cingularis anterior              | structure |
| anterior cingulate gyrus   | Gyrus cinguli anterior                  | structure |
| anterior cingulate gyrus   | Gyrus limbicus anterior                 | structure |
| anterior olfactory nucleus | anterior olfactory nuclei               | structure |
| anterior olfactory nucleus | anterior olfactory nucleus              | structure |
| anterior olfactory nucleus | Area retrobulbaris                      | structure |
| anterior olfactory nucleus | Nucleus olfactorius anterior            | structure |
| anterior olfactory nucleus | Regio retrobulbaris                     | structure |
| anterior olfactory nucleus | retrobulbar region                      | structure |
| basal forebrain nucleus    | basal forebrain nuclei                  | structure |

|                               |                                     |           |
|-------------------------------|-------------------------------------|-----------|
| basal forebrain nucleus       | basal magnocellular nucleus         | structure |
| basal forebrain nucleus       | basal nuclei                        | structure |
| basal forebrain nucleus       | basal nuclei of Meynert             | structure |
| basal forebrain nucleus       | basal nucleus                       | structure |
| basal forebrain nucleus       | basal nucleus of Meynert            | structure |
| basal forebrain nucleus       | ganglion of Meynert                 | structure |
| basal forebrain nucleus       | Nucleus basalis                     | structure |
| basal forebrain nucleus       | Nucleus basalis Meynert             | structure |
| basal forebrain nucleus       | nucleus basalis of Meynert          | structure |
| basal forebrain nucleus       | nucleus of substantia innominata    | structure |
| basal ganglia                 | basal ganglia                       | structure |
| basal ganglia                 | basal nuclei                        | structure |
| basal ganglia                 | corpus striatum                     | structure |
| basal ganglia                 | deep nuclear gray of hemisphere     | structure |
| basal ganglia                 | Ganglia basales                     | structure |
| basal ganglia                 | Nuclei basales                      | structure |
| basal ganglia                 | subcortical gray                    | structure |
| basal ganglia                 | telencephalic nuclei                | structure |
| basal nucleus of the amygdala | basal amygdaloid nuclei             | structure |
| basal nucleus of the amygdala | basal amygdaloid nucleus            | structure |
| basal nucleus of the amygdala | basal nuclei of the amygdala        | structure |
| basal nucleus of the amygdala | basolateral amygdaloid nucleus      | structure |
| basal nucleus of the amygdala | basolateral nucleus of amygdala     | structure |
| basal nucleus of the amygdala | intermediate principal nucleus      | structure |
| basal nucleus of the amygdala | Nucleus amygdalae basalis           | structure |
| basal nucleus of the amygdala | Nucleus amygdaloideus basalis       | structure |
| basal nucleus of the amygdala | Nucleus amygdaloideus basolateralis | structure |
| basal nucleus of the amygdala | Nucleus basalis amygdalae           | structure |
| Broca's area                  | anterior speech cortex              | structure |
| Broca's area                  | area of Broca                       | structure |
| Broca's area                  | Broca's area                        | structure |
| Broca's area                  | Broca's speech area                 | structure |
| Broca's area                  | convolution of Broca                | structure |
| Broca's area                  | motor speech area of Broca          | structure |
| calcarine sulcus              | calcarine fissure                   | structure |

|                      |                                           |           |
|----------------------|-------------------------------------------|-----------|
| calcarine sulcus     | calcarine sulci                           | structure |
| calcarine sulcus     | calcarine sulcus                          | structure |
| calcarine sulcus     | Fissura calcarina                         | structure |
| calcarine sulcus     | Sulcus calcarinus                         | structure |
| calcarine sulcus     | Sulcus calcarinus                         | structure |
| caudate nucleus      | caudate nuclei                            | structure |
| caudate nucleus      | caudate nucleus                           | structure |
| caudate nucleus      | Caudatus                                  | structure |
| caudate nucleus      | Nucleus caudatus                          | structure |
| centromedian nucleus | central magnocellular nucleus of thalamus | structure |
| centromedian nucleus | centre median nucleus                     | structure |
| centromedian nucleus | centromedian nuclei                       | structure |
| centromedian nucleus | centromedian nucleus                      | structure |
| centromedian nucleus | centromedian thalamic nucleus             | structure |
| centromedian nucleus | Centrum medianum                          | structure |
| centromedian nucleus | Centrum medianum thalami                  | structure |
| centromedian nucleus | Nucleus centralis centralis               | structure |
| centromedian nucleus | Nucleus centralis thalami                 | structure |
| centromedian nucleus | Nucleus centri mediani thalami            | structure |
| centromedian nucleus | Nucleus centromedianus                    | structure |
| centromedian nucleus | Nucleus centromedianus thalami            | structure |
| centromedian nucleus | Nucleus centrum medianum                  | structure |
| cerebellum           | Cerebellar                                | structure |
| cerebellum           | Cerebellum                                | structure |
| cerebellum           | Corpus cerebelli                          | structure |
| cerebellum           | epencephalon                              | structure |
| cingulate gyrus      | callosomarginal gyrus                     | structure |
| cingulate gyrus      | cingular gyrus                            | structure |
| cingulate gyrus      | cingulate area                            | structure |
| cingulate gyrus      | cingulate gyri                            | structure |
| cingulate gyrus      | cingulate gyrus                           | structure |
| cingulate gyrus      | cingulate region                          | structure |
| cingulate gyrus      | Gyri cinguli                              | structure |
| cingulate gyrus      | Gyrus cingulatus                          | structure |
| cingulate gyrus      | Gyrus cinguli                             | structure |

|                                |                                      |           |
|--------------------------------|--------------------------------------|-----------|
| cingulate gyrus                | upper limbic gyrus                   | structure |
| claustrum                      | claustrum                            | structure |
| cochlear nuclei                | cochlear nuclei                      | structure |
| cochlear nuclei                | cochlear nucleus                     | structure |
| cochlear nuclei                | Nuclei cochleares                    | structure |
| cuneate nucleus of the medulla | Burdach's nucleus                    | structure |
| cuneate nucleus of the medulla | cuneate nuclei                       | structure |
| cuneate nucleus of the medulla | cuneate nucleus                      | structure |
| cuneate nucleus of the medulla | cuneate nucleus                      | structure |
| cuneate nucleus of the medulla | Nucleus cuneatus                     | structure |
| cuneate nucleus of the medulla | Nucleus cuneatus medialis            | structure |
| cuneate nucleus of the medulla | Nucleus restiformis                  | structure |
| dentate gyrus                  | area dentata                         | structure |
| dentate gyrus                  | dentate gyri                         | structure |
| dentate gyrus                  | Fascia dentata                       | structure |
| dentate gyrus                  | Fascia dentata hippocampi            | structure |
| dentate gyrus                  | Gyrus dentatus                       | structure |
| dentate nucleus                | dentate nuclei                       | structure |
| dentate nucleus                | dentate nucleus                      | structure |
| dentate nucleus                | lateral nucleus of cerebellum        | structure |
| dentate nucleus                | Nucleus dentatus                     | structure |
| dentate nucleus                | Nucleus dentatus cerebelli           | structure |
| dentate nucleus                | Nucleus lateralis cerebelli          | structure |
| diagonal band                  | Bandeletta diagonalis                | structure |
| diagonal band                  | Broca's diagonal gyrus               | structure |
| diagonal band                  | diagonal band of Broca               | structure |
| diagonal band                  | diagonal bands                       | structure |
| diagonal band                  | diagonal gyrus                       | structure |
| diagonal band                  | Fasciculus diagonalis Brocae         | structure |
| diagonal band                  | Fasciculus olfactorius               | structure |
| diagonal band                  | Fasciculus olfactorius cornu Ammonis | structure |
| diagonal band                  | Fasciculus olfactorius hippocampi    | structure |
| diagonal band                  | Fasciculus septo-amygdalicus         | structure |
| diagonal band                  | Gyrus diagonalis                     | structure |
| diagonal band                  | gyrus diagonalis rhinencephli        | structure |

|                                         |                                         |           |
|-----------------------------------------|-----------------------------------------|-----------|
| diagonal band                           | olfactory fasciculus                    | structure |
| diagonal band                           | olfactory radiations of Zuckerkandl     | structure |
| diagonal band                           | Stria diagonalis                        | structure |
| dorsal motor nucleus of the vagus nerve | dorsal efferent nucleus of vagus        | structure |
| dorsal motor nucleus of the vagus nerve | dorsal motor nuclei                     | structure |
| dorsal motor nucleus of the vagus nerve | dorsal motor nucleus                    | structure |
| dorsal motor nucleus of the vagus nerve | dorsal nucleus of vagus nerve           | structure |
| dorsal motor nucleus of the vagus nerve | dorsal vagal nucleus                    | structure |
| dorsal motor nucleus of the vagus nerve | Nucleus alaris                          | structure |
| dorsal motor nucleus of the vagus nerve | Nucleus dorsalis motorius nervi vagi    | structure |
| dorsal motor nucleus of the vagus nerve | Nucleus dorsalis nervi vagi             | structure |
| dorsal motor nucleus of the vagus nerve | Nucleus vagalis dorsalis                | structure |
| dorsomedial nucleus of the hypothalamus | dorsomedial hypothalamic nucleus        | structure |
| dorsomedial nucleus of the hypothalamus | dorsomedial nucleus                     | structure |
| dorsomedial nucleus of the hypothalamus | dorsomedial nucleus of hypothalamus     | structure |
| dorsomedial nucleus of the hypothalamus | dorsomedial nucleus of the hypothalamus | structure |
| dorsomedial nucleus of the hypothalamus | Nucleus dorsomedialis hypothalami       | structure |
| dorsomedial nucleus of the hypothalamus | Nucleus hypothalamicus dorsomedialis    | structure |
| emboliform nucleus                      | anterior interposed nucleus             | structure |
| emboliform nucleus                      | anterior interpositus nucleus           | structure |
| emboliform nucleus                      | emboliform nuclei                       | structure |
| emboliform nucleus                      | emboliform nucleus                      | structure |
| emboliform nucleus                      | Nucleus emboliformis                    | structure |
| emboliform nucleus                      | Nucleus emboliformis cerebelli          | structure |
| emboliform nucleus                      | Nucleus interpositus anterior cerebelli | structure |
| entorhinal area                         | Area entorhinalis                       | structure |
| entorhinal area                         | Area entorhinalis ventralis et dorsalis | structure |
| entorhinal area                         | Cortex entorhinalis                     | structure |
| entorhinal area                         | entorhinal                              | structure |
| entorhinal area                         | entorhinal area                         | structure |
| entorhinal area                         | entorhinal cortex                       | structure |
| entorhinal area                         | entorhinal cortices                     | structure |
| entorhinal area                         | secondary olfactory cortex              | structure |
| entorhinal area                         | secondary olfactory cortical area       | structure |
| facial nucleus                          | branchiomotor nucleus of facial nerve   | structure |



|                   |                                     |           |
|-------------------|-------------------------------------|-----------|
| facial nucleus    | facial motor nuclei                 | structure |
| facial nucleus    | facial motor nucleus                | structure |
| facial nucleus    | facial nuclei                       | structure |
| facial nucleus    | motor nucleus of VII                | structure |
| facial nucleus    | Nucleus facialis                    | structure |
| facial nucleus    | Nucleus nervi facialis              | structure |
| fastigial nucleus | fastigial nuclei                    | structure |
| fastigial nucleus | fastigial nucleus                   | structure |
| fastigial nucleus | medial nucleus of cerebellum        | structure |
| fastigial nucleus | Nucleus fastigiatus                 | structure |
| fastigial nucleus | Nucleus fastigii                    | structure |
| fastigial nucleus | Nucleus fastigii cerebelli          | structure |
| fastigial nucleus | Nucleus fastigiatus cerebelli       | structure |
| fastigial nucleus | Nucleus motorius tecti cerebelli    | structure |
| fastigial nucleus | roof nucleus                        | structure |
| frontal eye field | frontal eye fields                  | structure |
| frontal eye field | frontal gaze center                 | structure |
| frontal eye field | frontal lobe eye field              | structure |
| frontal eye field | frontal motor eye field             | structure |
| frontal eye field | voluntary eye field                 | structure |
| fusiform gyrus    | fusiform gyri                       | structure |
| fusiform gyrus    | fusiform gyrus                      | structure |
| fusiform gyrus    | fusiform gyrus                      | structure |
| fusiform gyrus    | Gyrus fusiformis                    | structure |
| fusiform gyrus    | Gyrus fusiformis                    | structure |
| fusiform gyrus    | Gyrus occipito-temporalis lateralis | structure |
| fusiform gyrus    | Gyrus occipitotemporalis lateralis  | structure |
| fusiform gyrus    | lateral occipito-temporal gyrus     | structure |
| fusiform gyrus    | occipitotemporal gyri               | structure |
| fusiform gyrus    | occipitotemporal gyrus              | structure |
| globose nucleus   | globose nuclei                      | structure |
| globose nucleus   | globose nucleus                     | structure |
| globose nucleus   | Nuclei globosi                      | structure |
| globose nucleus   | Nucleus globosus                    | structure |
| globose nucleus   | Nucleus globosus cerebelli          | structure |

|                                |                                          |           |
|--------------------------------|------------------------------------------|-----------|
| globose nucleus                | Nucleus interpositus posterior cerebelli | structure |
| globose nucleus                | posterior interposed nucleus             | structure |
| globose nucleus                | posterior interpositus nucleus           | structure |
| globus pallidus                | globus pallidus                          | structure |
| globus pallidus                | Nucleus pallidus                         | structure |
| globus pallidus                | paleostriatum                            | structure |
| globus pallidus                | pallidum                                 | structure |
| gracile nucleus of the medulla | Goll's nucleus                           | structure |
| gracile nucleus of the medulla | gracile nuclei                           | structure |
| gracile nucleus of the medulla | gracile nucleus                          | structure |
| gracile nucleus of the medulla | gracile nucleus of the medulla           | structure |
| gracile nucleus of the medulla | Nucleus gracilis                         | structure |
| gustatory area                 | gustatory cortex                         | structure |
| gustatory area                 | gustatory cortices                       | structure |
| habenula                       | Ganglion habenulae                       | structure |
| habenula                       | Ganglion intercrurale                    | structure |
| habenula                       | Ganglion interpedunculare                | structure |
| habenula                       | Habenula                                 | structure |
| habenula                       | Habenula complex                         | structure |
| habenula                       | habenulae                                | structure |
| habenula                       | habenular                                | structure |
| habenula                       | habenular nuclei                         | structure |
| habenula                       | Nuclei habenulares                       | structure |
| habenula                       | Nucleus habenulae                        | structure |
| habenula                       | Nucleus habenularis                      | structure |
| hippocampus                    | Ammon's horn                             | structure |
| hippocampus                    | Cornu ammonis                            | structure |
| hippocampus                    | Hippocampal                              | structure |
| hippocampus                    | Hippocampi                               | structure |
| hippocampus                    | hippocampus major                        | structure |
| hippocampus                    | hippocampus proper                       | structure |
| hippocampus                    | hippocampuses                            | structure |
| hypothalamus                   | Hypothalami                              | structure |
| hypothalamus                   | hypothalamic                             | structure |
| hypothalamus                   | hypothalamuses                           | structure |

|                             |                                    |           |
|-----------------------------|------------------------------------|-----------|
| hypothalamus                | preoptico-hypothalamic area        | structure |
| hypothalamus                | preoptico-hypothalamic region      | structure |
| indusium griseum            | gray stria of Lancisi              | structure |
| inferior colliculus         | caudal colliculus                  | structure |
| inferior colliculus         | Colliculus caudalis                | structure |
| inferior colliculus         | Colliculus inferior                | structure |
| inferior colliculus         | Corpus bigeminalis caudalis        | structure |
| inferior colliculus         | Corpus bigeminum posterioris       | structure |
| inferior colliculus         | inferior colliculi                 | structure |
| inferior colliculus         | inferior colliculus                | structure |
| inferior colliculus         | posterior colliculus               | structure |
| inferior colliculus         | posterior corpus quadrigeminum     | structure |
| inferior frontal gyrus      | Gyrus frontalis inferior           | structure |
| inferior frontal gyrus      | Gyrus frontalis tertius            | structure |
| inferior frontal gyrus      | inferior frontal                   | structure |
| inferior frontal gyrus      | inferior frontal convolution       | structure |
| inferior frontal gyrus      | inferior frontal gyri              | structure |
| inferior frontal gyrus      | Regio subfrontalis                 | structure |
| inferior olive              | inferior olivary eminence          | structure |
| inferior olive              | inferior olives                    | structure |
| inferior olive              | olivary eminence                   | structure |
| inferior parietal lobule    | inferior parietal gyri             | structure |
| inferior parietal lobule    | inferior parietal gyrus            | structure |
| inferior parietal lobule    | inferior parietal lobules          | structure |
| inferior parietal lobule    | inferior portion of parietal gyrus | structure |
| inferior parietal lobule    | Lobulus parietalis inferior        | structure |
| inferior salivatory nucleus | inferior salivatory nuclei         | structure |
| inferior salivatory nucleus | inferior salivatory nucleus        | structure |
| inferior salivatory nucleus | Nucleus salivarius inferior        | structure |
| inferior salivatory nucleus | Nucleus salivatorius caudalis      | structure |
| inferior salivatory nucleus | Nucleus salivatorius inferior      | structure |
| inferior temporal gyrus     | Gyrus temporalis inferior          | structure |
| inferior temporal gyrus     | inferior temporal gyri             | structure |
| inferior temporal gyrus     | inferior temporal gyrus            | structure |
| inferior temporal gyrus     | lateral occipitotemporal gyrus     | structure |

|                               |                                                        |           |
|-------------------------------|--------------------------------------------------------|-----------|
| insula                        | Cortex insularis                                       | structure |
| insula                        | cortex of island                                       | structure |
| insula                        | insula cerebri                                         | structure |
| insula                        | insula lobule                                          | structure |
| insula                        | Insula Reilii                                          | structure |
| insula                        | insulae                                                | structure |
| insula                        | insular                                                | structure |
| insula                        | insular cortex                                         | structure |
| insula                        | insular gyrus                                          | structure |
| insula                        | insular lobe                                           | structure |
| insula                        | Insulas                                                | structure |
| insula                        | island of Reil                                         | structure |
| insula                        | Lobus insularis                                        | structure |
| interstitial nucleus of Cajal | interstitial nuclei of Cajal                           | structure |
| interstitial nucleus of Cajal | interstitial nucleus of Cajal                          | structure |
| interstitial nucleus of Cajal | interstitial nucleus of medial longitudinal fasciculus | structure |
| interstitial nucleus of Cajal | Nucleus interstitialis Cajal                           | structure |
| intralaminar nuclear group    | intralaminar nuclear group                             | structure |
| intralaminar nuclear group    | intralaminar nuclei                                    | structure |
| intralaminar nuclear group    | intralaminar nuclei of thalamus                        | structure |
| intralaminar nuclear group    | intralaminar thalamic nuclei                           | structure |
| intralaminar nuclear group    | nonspecific thalamic                                   | structure |
| intralaminar nuclear group    | Nuclei intralaminares                                  | structure |
| lateral geniculate nucleus    | Corpus geniculatum laterale                            | structure |
| lateral geniculate nucleus    | dorsal lateral geniculate nucleus                      | structure |
| lateral geniculate nucleus    | dorsal nuclei of lateral geniculate body               | structure |
| lateral geniculate nucleus    | dorsal nucleus of lateral geniculate body              | structure |
| lateral geniculate nucleus    | lateral geniculate bodies                              | structure |
| lateral geniculate nucleus    | lateral geniculate body                                | structure |
| lateral geniculate nucleus    | lateral geniculate nuclei                              | structure |
| lateral geniculate nucleus    | Nucleus corporis geniculati lateralis                  | structure |
| lateral geniculate nucleus    | Nucleus geniculatus lateralis dorsalis                 | structure |
| lingual gyrus                 | Gyrus lingualis                                        | structure |
| lingual gyrus                 | Gyrus occipitotemporalis medialis                      | structure |
| lingual gyrus                 | lingual gyri                                           | structure |

|                       |                                   |           |
|-----------------------|-----------------------------------|-----------|
| lingual gyrus         | lingual gyrus                     | structure |
| lingual gyrus         | lingula of cerebral hemisphere    | structure |
| lingual gyrus         | medial occipitotemporal gyrus     | structure |
| locus ceruleus        | Locus caeruleus                   | structure |
| locus ceruleus        | Locus caeruleus                   | structure |
| locus ceruleus        | locus ceruleus                    | structure |
| locus ceruleus        | Locus coeruleus                   | structure |
| locus ceruleus        | nucleus of locus caeruleus        | structure |
| locus ceruleus        | Nucleus pigmentosus pontis        | structure |
| locus ceruleus        | Substantia ferruginea             | structure |
| mammillary body       | Corpora mamillaria                | structure |
| mammillary body       | Corpora mamillaria                | structure |
| mammillary body       | Corpus mamillare                  | structure |
| mammillary body       | Corpus mamillaris                 | structure |
| mammillary body       | Corpus mamillare                  | structure |
| mammillary body       | mamillary body                    | structure |
| mammillary body       | mammillary bodies                 | structure |
| medial dorsal nucleus | dorsal medial nucleus of thalamus | structure |
| medial dorsal nucleus | dorsomedial nuclear group         | structure |
| medial dorsal nucleus | dorsomedial nuclei                | structure |
| medial dorsal nucleus | dorsomedial nucleus               | structure |
| medial dorsal nucleus | medial dorsal nuclei              | structure |
| medial dorsal nucleus | medial dorsal thalamic nucleus    | structure |
| medial dorsal nucleus | medial nuclear group              | structure |
| medial dorsal nucleus | medial thalamic nuclei            | structure |
| medial dorsal nucleus | medial thalamic nucleus           | structure |
| medial dorsal nucleus | mediodorsal nuclei                | structure |
| medial dorsal nucleus | mediodorsal nucleus               | structure |
| medial dorsal nucleus | mediodorsal thalamic nucleus      | structure |
| medial dorsal nucleus | Nuclei mediales thalami           | structure |
| medial dorsal nucleus | Nucleus dorsomedialis thalami     | structure |
| medial dorsal nucleus | Nucleus medialis dorsalis         | structure |
| medial dorsal nucleus | Nucleus medialis dorsalis thalami | structure |
| medial dorsal nucleus | Nucleus mediodorsalis thalami     | structure |
| medial dorsal nucleus | Nucleus thalamicus mediodorsalis  | structure |

|                                               |                                                 |           |
|-----------------------------------------------|-------------------------------------------------|-----------|
| medial frontal gyrus                          | Gyrus frontalis medialis                        | structure |
| medial frontal gyrus                          | Gyrus frontalis superior pars medialis          | structure |
| medial frontal gyrus                          | medial frontal gyri                             | structure |
| medial geniculate body                        | Corpus geniculatum mediale                      | structure |
| medial geniculate body                        | Corpus geniculatus medialis                     | structure |
| medial geniculate body                        | medial geniculate bodies                        | structure |
| medial geniculate body                        | medial geniculate body                          | structure |
| medial geniculate body                        | medial geniculate nuclei                        | structure |
| medial geniculate body                        | medial geniculate nucleus                       | structure |
| medial geniculate body                        | Nucleus corporis geniculati medialis            | structure |
| medial geniculate body                        | Nucleus geniculatus medialis                    | structure |
| medial parietal gyrus                         | Gyrus parietalis medialis                       | structure |
| medial parietal gyrus                         | medial parietal gyri                            | structure |
| medial prefrontal cortex                      | medial prefrontal cortex                        | structure |
| medial prefrontal cortex                      | medial prefrontal cortices                      | structure |
| medulla                                       | medulla                                         | structure |
| medulla                                       | medulla oblongata                               | structure |
| mesencephalic nucleus of the trigeminal nerve | mesencephalic nucleus                           | structure |
| mesencephalic nucleus of the trigeminal nerve | mesencephalic nucleus of the trigeminal nerve   | structure |
| mesencephalic nucleus of the trigeminal nerve | Nucleus mesencephalicus nervi trigeminalis      | structure |
| mesencephalic nucleus of the trigeminal nerve | Nucleus tractus mesencephalici nervi trigemini  | structure |
| mesencephalic nucleus of the trigeminal nerve | Nucleus tractus mesencephalici nervi trigemini  | structure |
| mesencephalic nucleus of the trigeminal nerve | Nucleus tractus mesencephalicus nervi trigemini | structure |
| middle frontal gyrus                          | Gyrus frontalis medialis                        | structure |
| middle frontal gyrus                          | Gyrus frontalis medius                          | structure |
| middle frontal gyrus                          | Gyrus frontalis secundus                        | structure |
| middle frontal gyrus                          | intermediate frontal gyrus                      | structure |
| middle frontal gyrus                          | middle frontal gyri                             | structure |
| middle temporal gyrus                         | Gyrus temporalis medius                         | structure |
| middle temporal gyrus                         | intermediate temporal gyrus                     | structure |
| middle temporal gyrus                         | middle temporal gyri                            | structure |
| middle temporal gyrus                         | middle temporal gyrus                           | structure |
| nucleus accumbens                             | accumbens nuclei                                | structure |
| nucleus accumbens                             | accumbens nucleus                               | structure |
| nucleus accumbens                             | Colliculus nuclei caudati                       | structure |

|                            |                                             |           |
|----------------------------|---------------------------------------------|-----------|
| nucleus accumbens          | colliculus of caudate nucleus               | structure |
| nucleus accumbens          | nucleus accumbens                           | structure |
| nucleus accumbens          | Nucleus accumbens septi                     | structure |
| nucleus ambiguus           | ambiguus nuclei                             | structure |
| nucleus ambiguus           | ambiguus nucleus                            | structure |
| nucleus ambiguus           | nucleus ambiguus                            | structure |
| nucleus ambiguus           | Nucleus ambiguus                            | structure |
| nucleus ambiguus           | Nucleus innominatus                         | structure |
| oculomotor nuclear complex | Nucleus nervi oculomotorii                  | structure |
| oculomotor nuclear complex | Nucleus oculomotorius                       | structure |
| oculomotor nuclear complex | nucleus of oculomotor nerve                 | structure |
| oculomotor nuclear complex | oculomotor nuclear complex                  | structure |
| oculomotor nuclear complex | oculomotor nuclei                           | structure |
| oculomotor nuclear complex | oculomotor nucleus                          | structure |
| olfactory bulb             | Bulbus olfactorius                          | structure |
| olfactory bulb             | olfactory bulb                              | structure |
| operculum                  | opercular portion of inferior frontal gyrus | structure |
| operculum                  | operculum                                   | structure |
| operculum                  | Pars opercularis gyri frontalis inferioris  | structure |
| operculum                  | Pars posterior of inferior frontal gyrus    | structure |
| operculum                  | posterior part of inferior frontal gyrus    | structure |
| orbital gyri               | Cortex orbitofrontalis                      | structure |
| orbital gyri               | Gyri orbitales                              | structure |
| orbital gyri               | Gyrus orbitalis                             | structure |
| orbital gyri               | gyrus orbitalis longitudinalis              | structure |
| orbital gyri               | Gyrus orbitofrontalis                       | structure |
| orbital gyri               | orbital area                                | structure |
| orbital gyri               | orbital cortex                              | structure |
| orbital gyri               | orbital cortices                            | structure |
| orbital gyri               | orbital gyri                                | structure |
| orbital gyri               | orbitofrontal cortex                        | structure |
| orbital gyri               | orbitofrontal cortices                      | structure |
| orbital gyri               | orbitofrontal gyri                          | structure |
| orbital gyri               | orbitofrontal gyrus                         | structure |
| orbital gyri               | orbitofrontal region                        | structure |

|                         |                           |           |
|-------------------------|---------------------------|-----------|
| parahippocampal gyrus   | Gyrus hippocampi          | structure |
| parahippocampal gyrus   | Gyrus parahippocampalis   | structure |
| parahippocampal gyrus   | Gyrus parahippocampi      | structure |
| parahippocampal gyrus   | hippocampal gyri          | structure |
| parahippocampal gyrus   | hippocampal gyrus         | structure |
| parahippocampal gyrus   | parahippocampal gyri      | structure |
| parahippocampal gyrus   | parahippocampal gyrus     | structure |
| periaqueductal          | periaqueductal gray       | structure |
| periaqueductal          | periaqueductal grey       | structure |
| perirhinal area         | Area perirhinalis         | structure |
| perirhinal area         | Area perirhinalis         | structure |
| perirhinal area         | perirhinal area           | structure |
| perirhinal area         | perirhinal cortex         | structure |
| perirhinal area         | perirhinal cortices       | structure |
| periventricular nucleus | periventricular nuclei    | structure |
| pineal body             | Conarium                  | structure |
| pineal body             | Corpus pineale            | structure |
| pineal body             | Corpus pineale            | structure |
| pineal body             | Epiphysis                 | structure |
| pineal body             | Epiphysis cerebri         | structure |
| pineal body             | Glandula pinealis         | structure |
| pineal body             | pineal body               | structure |
| pineal body             | pineal gland              | structure |
| planum temporale        | planum temporale          | structure |
| pons                    | pons cerebri              | structure |
| pons                    | Pons Varolii              | structure |
| pontine nuclei          | Nuclei brachii pontis     | structure |
| pontine nuclei          | Nuclei pontis             | structure |
| pontine nuclei          | Nucleus pontis            | structure |
| pontine nuclei          | pontine nuclei            | structure |
| postcentral gyrus       | Gyrus centralis posterior | structure |
| postcentral gyrus       | Gyrus postcentralis       | structure |
| postcentral gyrus       | PoG                       | structure |
| postcentral gyrus       | postcentral gyri          | structure |
| postcentral gyrus       | postcentral gyrus         | structure |



|                                       |                                       |           |
|---------------------------------------|---------------------------------------|-----------|
| postcentral gyrus                     | posterior central gyrus               | structure |
| postcentral gyrus                     | postrolandic gyri                     | structure |
| postcentral gyrus                     | postrolandic gyrus                    | structure |
| posterior cingulate gyrus             | Gyrus cinguli posterior               | structure |
| posterior cingulate gyrus             | Gyrus limbicus posterior              | structure |
| posterior cingulate gyrus             | posterior cingulate                   | structure |
| posterior cingulate gyrus             | posterior cingulate gyri              | structure |
| posterior cingulate gyrus             | posterior cingulate gyrus             | structure |
| posterior nucleus of the hypothalamus | Area hypothalamica posterior          | structure |
| posterior nucleus of the hypothalamus | Area posterior hypothalami            | structure |
| posterior nucleus of the hypothalamus | Nucleus hypothalamicus posterior      | structure |
| posterior nucleus of the hypothalamus | posterior hypothalamic area           | structure |
| posterior nucleus of the hypothalamus | posterior hypothalamic nucleus        | structure |
| posterior nucleus of the hypothalamus | posterior nuclei                      | structure |
| posterior nucleus of the hypothalamus | posterior nucleus                     | structure |
| posterior nucleus of the hypothalamus | posterior nucleus of hypothalamus     | structure |
| posterior nucleus of the hypothalamus | posterior nucleus of the hypothalamus | structure |
| posterior parahippocampal gyrus       | posterior parahippocampal gyri        | structure |
| posterior parahippocampal gyrus       | posterior parahippocampal gyrus       | structure |
| precuneus                             | Praecuneus                            | structure |
| precuneus                             | precuneate lobule                     | structure |
| precuneus                             | quadrate lobule                       | structure |
| prefrontal cortex                     | prefrontal cortex                     | structure |
| prefrontal cortex                     | prefrontal cortices                   | structure |
| premotor cortex                       | intermediate precentral cortex        | structure |
| premotor cortex                       | premotor area                         | structure |
| premotor cortex                       | premotor cortex                       | structure |
| premotor cortex                       | premotor cortices                     | structure |
| premotor cortex                       | promotor cortex                       | structure |
| primary auditory area                 | primary auditory area                 | structure |
| primary auditory area                 | primary auditory cortex               | structure |
| primary auditory area                 | primary auditory cortices             | structure |
| primary motor cortex                  | motor area                            | structure |
| primary motor cortex                  | motor cortex                          | structure |
| primary motor cortex                  | motor cortices                        | structure |

|                                   |                                          |           |
|-----------------------------------|------------------------------------------|-----------|
| primary motor cortex              | motor strip                              | structure |
| primary motor cortex              | precentral motor area                    | structure |
| primary motor cortex              | precentral motor cortex                  | structure |
| primary motor cortex              | primary motor area                       | structure |
| primary motor cortex              | primary motor cortex                     | structure |
| primary motor cortex              | primary motor cortices                   | structure |
| primary somesthetic area          | postcentral tactile area                 | structure |
| primary somesthetic area          | primary somatic sensory area             | structure |
| primary somesthetic area          | primary somatosensory cortex             | structure |
| primary somesthetic area          | primary somatosensory cortices           | structure |
| primary somesthetic area          | primary somesthetic area                 | structure |
| primary somesthetic area          | primary somesthetic cortex               | structure |
| primary somesthetic area          | somatic afferent area                    | structure |
| primary somesthetic area          | somatosensory strip                      | structure |
| primary visual cortex             | primary visual cortices                  | structure |
| pulvinar                          | Nuclei pulvinares                        | structure |
| pulvinar                          | Nucleus pulvinaris                       | structure |
| pulvinar                          | Nucleus pulvinaris thalami               | structure |
| pulvinar                          | pulvinar nuclei                          | structure |
| pulvinar                          | pulvinar nucleus                         | structure |
| pulvinar                          | Pulvinar thalami                         | structure |
| putamen                           | Nucleus putamen                          | structure |
| raphe nuclei                      | Nuclei raphae                            | structure |
| raphe nuclei                      | Nuclei raphes                            | structure |
| raphe nuclei                      | Nucleus of the raphe                     | structure |
| raphe nuclei                      | Nucleus raphe                            | structure |
| raphe nuclei                      | raphe nuclei                             | structure |
| red nucleus                       | Nucleus rotundus subthalamo-peduncularis | structure |
| red nucleus                       | Nucleus ruber                            | structure |
| red nucleus                       | Nucleus ruber tegmenti                   | structure |
| red nucleus                       | red nuclei                               | structure |
| red nucleus                       | red nucleus                              | structure |
| reticular nucleus of the thalamus | Nucleus reticularis                      | structure |
| reticular nucleus of the thalamus | Nucleus reticularis thalami              | structure |
| reticular nucleus of the thalamus | Nucleus thalamicus reticularis           | structure |

|                                   |                                   |           |
|-----------------------------------|-----------------------------------|-----------|
| reticular nucleus of the thalamus | reticular nuclear group           | structure |
| reticular nucleus of the thalamus | reticular nucleus of the thalamus | structure |
| reticular nucleus of the thalamus | reticular thalamic nuclei         | structure |
| reticular nucleus of the thalamus | reticular thalamic nucleus        | structure |
| reticular nucleus of the thalamus | thalamic reticular nuclei         | structure |
| reticular nucleus of the thalamus | thalamic reticular nucleus        | structure |
| second auditory area              | thalamic reticular nucleus        | structure |
| second auditory area              | second auditory area              | structure |
| second auditory area              | second auditory cortex            | structure |
| secondary somesthetic area        | second auditory cortices          | structure |
| secondary somesthetic area        | second somatic sensory area       | structure |
| secondary somesthetic area        | secondary sensory cortex          | structure |
| secondary somesthetic area        | secondary sensory cortices        | structure |
| septum                            | secondary somesthetic area        | structure |
| septum                            | Massa praecommissuralis           | structure |
| septum                            | septum                            | structure |
| solitary nucleus                  | Septum telencephali               | structure |
| solitary nucleus                  | Nuclei tractus solitarii          | structure |
| solitary nucleus                  | Nucleus fasciculus solitarius     | structure |
| solitary nucleus                  | nucleus of solitary tract         | structure |
| solitary nucleus                  | nucleus of the solitary tract     | structure |
| solitary nucleus                  | nucleus of tractus solitarius     | structure |
| solitary nucleus                  | Nucleus solitarius                | structure |
| solitary nucleus                  | Nucleus tracti solitarii          | structure |
| solitary nucleus                  | Nucleus tractus solitarii         | structure |
| solitary nucleus                  | solitary nuclear complex          | structure |
| solitary nucleus                  | solitary nuclei                   | structure |
| straight gyrus                    | gyrus rectus                      | structure |
| straight gyrus                    | medial part of gyri orbitales     | structure |
| straight gyrus                    | rectal gyri                       | structure |
| straight gyrus                    | rectal gyrus                      | structure |
| straight gyrus                    | rectus gyrus                      | structure |
| straight gyrus                    | ventromedial gyrus                | structure |
| stria terminalis                  | Fibrae striae terminalis          | structure |
| stria terminalis                  | semicircular stria                | structure |

|                        |                                             |           |
|------------------------|---------------------------------------------|-----------|
| stria terminalis       | Stria semicircularis                        | structure |
| striatum               | Corpus striatum                             | structure |
| striatum               | neostriatum                                 | structure |
| subiculum              | subiculum                                   | structure |
| subiculum              | subiculum hippocampi                        | structure |
| substantia nigra       | nucleus of basis pedunculi                  | structure |
| substantia nigra       | Nucleus pigmentosus subthalamo-peduncularis | structure |
| substantia nigra       | substantia nigra                            | structure |
| subthalamic nucleus    | body of Forel                               | structure |
| subthalamic nucleus    | body of Luys                                | structure |
| subthalamic nucleus    | Corpus hypothalamicum                       | structure |
| subthalamic nucleus    | Corpus Luysi                                | structure |
| subthalamic nucleus    | Corpus subthalamicum                        | structure |
| subthalamic nucleus    | nucleus of Luys                             | structure |
| subthalamic nucleus    | Nucleus subthalamicus                       | structure |
| subthalamic nucleus    | Nucleus subthalamicus                       | structure |
| subthalamic nucleus    | subthalamic nuclei                          | structure |
| superior colliculus    | anterior colliculus                         | structure |
| superior colliculus    | anterior corpus quadrigeminum               | structure |
| superior colliculus    | Colliculus bigeminalis oralis               | structure |
| superior colliculus    | Colliculus cranialis                        | structure |
| superior colliculus    | Colliculus rostralis                        | structure |
| superior colliculus    | Colliculus superior                         | structure |
| superior colliculus    | Colliculus superior                         | structure |
| superior colliculus    | Corpus quadrigeminum superius               | structure |
| superior colliculus    | cranial colliculus                          | structure |
| superior colliculus    | optic tectum                                | structure |
| superior colliculus    | superior colliculi                          | structure |
| superior colliculus    | superior colliculus                         | structure |
| superior frontal gyrus | Gyrus frontalis primus                      | structure |
| superior frontal gyrus | Gyrus frontalis superior                    | structure |
| superior frontal gyrus | Gyrus frontalis superior                    | structure |
| superior frontal gyrus | marginal gyri                               | structure |
| superior frontal gyrus | marginal gyrus                              | structure |
| superior frontal gyrus | superior frontal convolution                | structure |

|                             |                                       |           |
|-----------------------------|---------------------------------------|-----------|
| superior frontal gyrus      | superior frontal gyri                 | structure |
| superior frontal gyrus      | superior frontal gyrus                | structure |
| superior olive              | Nucleus olivaris metencephali         | structure |
| superior olive              | Nucleus olivaris rostralis            | structure |
| superior olive              | Nucleus olivaris superior             | structure |
| superior olive              | Nucleus olivaris superioris           | structure |
| superior olive              | Oliva superior                        | structure |
| superior olive              | superior olivary nuclei               | structure |
| superior olive              | superior olivary nucleus              | structure |
| superior olive              | superior olives                       | structure |
| superior parietal lobule    | Gyrus parietalis superior             | structure |
| superior parietal lobule    | Lobulus parietalis superior           | structure |
| superior parietal lobule    | superior parietal gyri                | structure |
| superior parietal lobule    | superior parietal gyrus               | structure |
| superior parietal lobule    | superior parietal lobule              | structure |
| superior parietal lobule    | superior portion of parietal gyrus    | structure |
| superior salivatory nucleus | Nucleus salivarius superior           | structure |
| superior salivatory nucleus | Nucleus salivatorius cranialis        | structure |
| superior salivatory nucleus | Nucleus salivatorius rostralis        | structure |
| superior salivatory nucleus | Nucleus salivatorius superior         | structure |
| superior salivatory nucleus | superior salivatory nuclei            | structure |
| superior temporal gyrus     | Gyrus temporalis superior             | structure |
| superior temporal gyrus     | Gyrus temporalis superior             | structure |
| superior temporal gyrus     | superior temporal gyri                | structure |
| supplementary motor cortex  | supplementary motor area              | structure |
| supplementary motor cortex  | supplementary motor areas             | structure |
| supplementary motor cortex  | supplementary motor cortices          | structure |
| suprachiasmatic nucleus     | Nucleus suprachiasmaticus hypothalami | structure |
| suprachiasmatic nucleus     | suprachiasmatic nuclei                | structure |
| temporal operculum          | facies supratemporalis                | structure |
| temporal operculum          | Operculum temporale                   | structure |
| temporal operculum          | supratemporal plane                   | structure |
| temporal operculum          | temporal operculum                    | structure |
| temporal pole               | Polus temporalis                      | structure |
| temporoparietal junction    | temporoparietal junction              | structure |

|                                |                                               |           |
|--------------------------------|-----------------------------------------------|-----------|
| thalamus                       | thalamencephalon                              | structure |
| thalamus                       | thalami                                       | structure |
| thalamus                       | Thalamus dorsalis                             | structure |
| thalamus                       | thalamus opticus                              | structure |
| thalamus                       | thalamuses                                    | structure |
| transverse temporal gyrus      | convolutions of Heschl                        | structure |
| transverse temporal gyrus      | gyri of Heschl                                | structure |
| transverse temporal gyrus      | Gyri temporales transversi                    | structure |
| transverse temporal gyrus      | Heschl's convolutions                         | structure |
| transverse temporal gyrus      | Heschl's gyri                                 | structure |
| transverse temporal gyrus      | Heschl's gyrus                                | structure |
| transverse temporal gyrus      | transverse temporal gyri                      | structure |
| trapezoid body                 | corpus trapezoides                            | structure |
| trapezoid body                 | Corpus trapezoideum                           | structure |
| trapezoid body                 | trapezoid bodies                              | structure |
| tuber cinereum                 | tuber cinereum                                | structure |
| ventral anterior nucleus       | Nucleus lateropolaris                         | structure |
| ventral anterior nucleus       | Nucleus ventralis anterior                    | structure |
| ventral anterior nucleus       | Nucleus ventralis anterior thalami            | structure |
| ventral anterior nucleus       | Nucleus ventralis thalami anterior            | structure |
| ventral anterior nucleus       | ventral anterior nuclei                       | structure |
| ventral anterior nucleus       | ventral anterior thalamic nuclei              | structure |
| ventral anterior nucleus       | ventral anterior thalamic nucleus             | structure |
| ventral anterior nucleus       | ventroanterior thalamic nuclei                | structure |
| ventral anterior nucleus       | ventroanterior thalamic nucleus               | structure |
| ventral posterior nucleus      | Nuclei ventrales posteriores                  | structure |
| ventral posterior nucleus      | Nucleus ventralis posterior                   | structure |
| ventral posterior nucleus      | ventral posterior nuclei                      | structure |
| ventral posterior nucleus      | ventral posterior thalamic nuclei             | structure |
| ventral posterior nucleus      | ventral posterior thalamic nucleus            | structure |
| ventral posterior nucleus      | ventrobasal complex                           | structure |
| ventral posterior nucleus      | ventrobasal nuclei                            | structure |
| ventral posterior nucleus      | ventrobasal nucleus                           | structure |
| ventral posterolateral nucleus | Nucleus ventralis posterior lateralis thalami | structure |
| ventral posterolateral nucleus | Nucleus ventralis posterolateralis            | structure |

|                                |                                               |           |
|--------------------------------|-----------------------------------------------|-----------|
| ventral posterolateral nucleus | Nucleus ventralis posterolateralis thalami    | structure |
| ventral posterolateral nucleus | Nucleus ventralis thalami posterior lateralis | structure |
| ventral posterolateral nucleus | posterolateral ventral nucleus of thalamus    | structure |
| ventral posterolateral nucleus | ventral posterolateral nuclei                 | structure |
| ventral posterolateral nucleus | ventral posterolateral nucleus                | structure |
| ventral posterolateral nucleus | ventral posterolateral nucleus of thalamus    | structure |
| ventral posterolateral nucleus | ventral posterolateral thalamic nuclei        | structure |
| ventral posterolateral nucleus | ventral posterolateral thalamic nucleus       | structure |
| ventral posteromedial nucleus  | arcuate nucleus of thalamus                   | structure |
| ventral posteromedial nucleus  | Nucleus arcuatus thalami                      | structure |
| ventral posteromedial nucleus  | Nucleus semilunaris thalami                   | structure |
| ventral posteromedial nucleus  | Nucleus ventralis posterior medialis thalami  | structure |
| ventral posteromedial nucleus  | Nucleus ventralis posteromedialis             | structure |
| ventral posteromedial nucleus  | Nucleus ventralis posteromedialis thalami     | structure |
| ventral posteromedial nucleus  | Nucleus ventrocaudalis anterior internus      | structure |
| ventral posteromedial nucleus  | posteromedial ventral nucleus of thalamus     | structure |
| ventral posteromedial nucleus  | semilunar nucleus                             | structure |
| ventral posteromedial nucleus  | thalamic gustatory nucleus                    | structure |
| ventral posteromedial nucleus  | ventral posterior medial nuclei               | structure |
| ventral posteromedial nucleus  | ventral posterior medial nucleus              | structure |
| ventral posteromedial nucleus  | ventral posteromedial nuclei                  | structure |
| ventral posteromedial nucleus  | ventral posteromedial nucleus                 | structure |
| ventral posteromedial nucleus  | ventral posteromedial nucleus of thalamus     | structure |
| ventral tegmental area         | Area tegmentalis ventralis                    | structure |
| ventral tegmental area         | ventral tegmental area of Tsai                | structure |
| ventral tegmental area         | ventral tegmental nucleus of Tsai             | structure |
| vestibular nuclei              | Nuclei vestibulares                           | structure |
| vestibular nuclei              | vestibular nuclear complex                    | structure |
| vestibular nuclei              | vestibular nuclei                             | structure |
| vestibular nuclei              | vestibular nuclei                             | structure |
| vestibular nuclei              | vestibular nucleus                            | structure |
| visual extrastriate            | visual extrastriate cortex                    | structure |
| visual extrastriate            | visual extrastriate cortices                  | structure |
| Wernicke's area                | area of Wernicke                              | structure |
| Wernicke's area                | Wernicke's area                               | structure |

Wernicke's area  
zona incerta

Wernicke's speech area  
zona incerta

structure  
structure
