# Supplementary material
Source: PubMed Central journal article supplement (PMC3376233)
Supplement: NIHMS376884-supplement-02.pdf [file NIHMS376884-supplement-02.pdf]

| <b>Term A</b>          | <b>Term B</b>     | <b>Term C</b>                  | <b>A+B</b> | <b>B+C</b> | <b>A+C</b> |
|------------------------|-------------------|--------------------------------|------------|------------|------------|
| aging                  | cerebellum        | fastigial nucleus              | 3037       | 1574       | 30         |
| aging                  | anxiety           | panic disorder                 | 1554       | 4872       | 27         |
| aging                  | anxiety           | social phobia                  | 1554       | 1828       | 7          |
| anger                  | anxiety           | GABA                           | 2380       | 3481       | 9          |
| arousal                | hypothalamus      | gonadotropin-releasing hormone | 1628       | 6562       | 26         |
| arousal                | hypothalamus      | neurohypophysis                | 1628       | 1471       | 10         |
| arousal                | hypothalamus      | human growth hormone           | 1628       | 1125       | 27         |
| arousal                | norepinephrine    | glucagon                       | 1248       | 1762       | 22         |
| arousal                | hippocampus       | neurogenesis                   | 1153       | 2850       | 16         |
| arousal                | hippocampus       | BDNF                           | 1153       | 2445       | 26         |
| arousal                | hippocampus       | subiculum                      | 1153       | 1690       | 18         |
| arousal                | hippocampus       | fornix                         | 1153       | 1261       | 23         |
| audition               | cerebellum        | dentate nucleus                | 1213       | 2398       | 17         |
| audition               | cerebellum        | fastigial nucleus              | 1213       | 1574       | 10         |
| audition               | cerebellum        | putamen                        | 1213       | 1655       | 15         |
| audition               | cerebellum        | substantia nigra               | 1213       | 1739       | 10         |
| audition               | cerebellum        | caudate nucleus                | 1213       | 1382       | 18         |
| audition               | cerebellum        | inferior olive                 | 1213       | 1124       | 3          |
| audition               | cerebellum        | dentate gyrus                  | 1213       | 1023       | 7          |
| audition               | aging             | androgen                       | 2062       | 2445       | 20         |
| audition               | aging             | dentate gyrus                  | 2062       | 1014       | 7          |
| audition               | aging             | progesterone                   | 2062       | 1303       | 11         |
| audition               | aging             | cortisol                       | 2062       | 1020       | 26         |
| auditory perception    | visual perception | visual search                  | 3917       | 1058       | 30         |
| awareness              | diabetes          | somatostatin                   | 2327       | 1733       | 18         |
| awareness              | diabetes          | aldosterone                    | 2327       | 1472       | 28         |
| awareness              | diabetes          | acetylcholine                  | 2327       | 1404       | 28         |
| classical conditioning | fear              | AIDS                           | 1954       | 1827       | 5          |
| classical conditioning | fear              | HIV                            | 1954       | 1702       | 1          |
| classical conditioning | hippocampus       | neurogenesis                   | 1449       | 2850       | 22         |
| classical conditioning | hippocampus       | BDNF                           | 1449       | 2445       | 29         |
| classical conditioning | hippocampus       | spatial memory                 | 1449       | 2009       | 26         |
| classical conditioning | hippocampus       | subiculum                      | 1449       | 1690       | 17         |
| classical conditioning | hippocampus       | fornix                         | 1449       | 1261       | 29         |
| classical conditioning | hippocampus       | parahippocampal gyrus          | 1449       | 1052       | 12         |
| classical conditioning | hippocampus       | stroke                         | 1449       | 1174       | 19         |
| consciousness          | seizure           | dentate gyrus                  | 2211       | 1568       | 8          |
| consciousness          | epilepsy          | dentate gyrus                  | 1504       | 1354       | 8          |
| consciousness          | sleep             | melatonin                      | 1144       | 2325       | 13         |
| consciousness          | stroke            | estrogen                       | 1051       | 1209       | 27         |
| decision making        | dementia          | ataxia                         | 1024       | 1069       | 15         |
| decision making        | anxiety           | panic disorder                 | 1157       | 4872       | 24         |
| decision making        | anxiety           | social phobia                  | 1157       | 1828       | 9          |

|                   |                                          |                       |      |       |    |
|-------------------|------------------------------------------|-----------------------|------|-------|----|
| decision making   | diabetes                                 | glucagon              | 1023 | 8044  | 3  |
| decision making   | diabetes                                 | vasopressin           | 1023 | 2876  | 19 |
| decision making   | diabetes                                 | somatostatin          | 1023 | 1733  | 16 |
| decision making   | diabetes                                 | aldosterone           | 1023 | 1472  | 16 |
| decision making   | diabetes                                 | acetylcholine         | 1023 | 1404  | 23 |
| decision making   | diabetes                                 | human growth hormone  | 1023 | 1043  | 22 |
| eye movement      | cerebellum                               | olfactory bulb        | 1874 | 1667  | 9  |
| eye movement      | cerebellum                               | dentate gyrus         | 1874 | 1023  | 27 |
| eye movement      | rhythm                                   | testosterone          | 1241 | 1287  | 25 |
| eye movement      | rhythm                                   | estradiol             | 1241 | 1093  | 25 |
| facial expression | visual perception                        | saccade               | 1050 | 1409  | 25 |
| facial expression | visual perception                        | primary visual cortex | 1050 | 1014  | 12 |
| fear              | hippocampus                              | subiculum             | 1767 | 1690  | 22 |
| fear              | hippocampus                              | caudate nucleus       | 1767 | 1779  | 26 |
| fear              | hippocampus                              | fornix                | 1767 | 1261  | 16 |
| fear              | hippocampus                              | corpus callosum       | 1767 | 1182  | 18 |
| fear              | hippocampus                              | globus pallidus       | 1767 | 1092  | 24 |
| fear              | hippocampus                              | habenula              | 1767 | 1105  | 21 |
| form perception   | vision                                   | diabetes              | 1641 | 3678  | 9  |
| hallucination     | schizophrenia                            | prolactin             | 3494 | 1145  | 27 |
| hallucination     | dementia                                 | Lou Gehrigs disease   | 1478 | 1061  | 6  |
| hallucination     | sleep                                    | melatonin             | 1036 | 2325  | 11 |
| hallucination     | sleep                                    | cortisol              | 1036 | 1277  | 16 |
| hallucination     | sleep                                    | insulin               | 1036 | 1284  | 20 |
| imprinting        | insulin                                  | glucagon              | 1005 | 19604 | 7  |
| imprinting        | insulin                                  | human growth hormone  | 1005 | 6851  | 22 |
| imprinting        | insulin                                  | somatostatin          | 1005 | 5969  | 9  |
| imprinting        | insulin                                  | cortisol              | 1005 | 5326  | 13 |
| imprinting        | insulin                                  | epinephrine           | 1005 | 5622  | 14 |
| imprinting        | insulin                                  | prolactin             | 1005 | 3940  | 16 |
| imprinting        | insulin                                  | norepinephrine        | 1005 | 4449  | 21 |
| imprinting        | insulin                                  | progesterone          | 1005 | 3046  | 28 |
| imprinting        | insulin                                  | thyroxine             | 1005 | 2337  | 25 |
| imprinting        | insulin                                  | triiodothyronine      | 1005 | 2147  | 22 |
| imprinting        | insulin                                  | rhythm                | 1005 | 2623  | 21 |
| imprinting        | insulin                                  | coma                  | 1005 | 1983  | 0  |
| imprinting        | insulin                                  | alcoholism            | 1005 | 1695  | 17 |
| imprinting        | insulin                                  | aldosterone           | 1005 | 1357  | 4  |
| imprinting        | insulin                                  | stroke                | 1005 | 1820  | 8  |
| imprinting        | insulin                                  | acetylcholine         | 1005 | 1287  | 12 |
| imprinting        | insulin                                  | vasopressin           | 1005 | 1091  | 15 |
| imprinting        | insulin                                  | HIV                   | 1005 | 1329  | 22 |
| inattention       | attention deficit hyperactivity disorder | diabetes              | 1719 | 1022  | 17 |
| intelligence      | visual perception                        | primary visual cortex | 1248 | 1014  | 11 |

|              |               |                                       |      |      |    |
|--------------|---------------|---------------------------------------|------|------|----|
| intelligence | dementia      | Lou Gehrigs disease                   | 1471 | 1061 | 28 |
| intelligence | schizophrenia | prolactin                             | 1639 | 1145 | 19 |
| intelligence | schizophrenia | GABA                                  | 1639 | 1080 | 19 |
| intelligence | epilepsy      | GABA                                  | 1619 | 4449 | 19 |
| intelligence | epilepsy      | dentate gyrus                         | 1619 | 1354 | 5  |
| intelligence | epilepsy      | migraine                              | 1619 | 1481 | 30 |
| intelligence | seizure       | GABA                                  | 1097 | 5231 | 19 |
| intelligence | seizure       | dentate gyrus                         | 1097 | 1568 | 5  |
| intelligence | anxiety       | panic disorder                        | 1135 | 4872 | 7  |
| intelligence | anxiety       | GABA                                  | 1135 | 3481 | 19 |
| intelligence | anxiety       | social phobia                         | 1135 | 1828 | 7  |
| intelligence | vision        | habenula                              | 1016 | 1646 | 19 |
| intelligence | aging         | acetylcholine                         | 1395 | 1712 | 19 |
| intelligence | aging         | habenula                              | 1395 | 1355 | 19 |
| intelligence | aging         | GABA                                  | 1395 | 1347 | 19 |
| intelligence | aging         | glucocorticoid                        | 1395 | 1298 | 29 |
| intelligence | aging         | dentate gyrus                         | 1395 | 1014 | 5  |
| neurogenesis | hippocampus   | putamen                               | 2850 | 1890 | 27 |
| neurogenesis | hippocampus   | subiculum                             | 2850 | 1690 | 16 |
| neurogenesis | hippocampus   | caudate nucleus                       | 2850 | 1779 | 24 |
| neurogenesis | hippocampus   | amnesia                               | 2850 | 1611 | 7  |
| neurogenesis | hippocampus   | raphe nuclei                          | 2850 | 1464 | 27 |
| neurogenesis | hippocampus   | fornix                                | 2850 | 1261 | 8  |
| neurogenesis | hippocampus   | locus ceruleus                        | 2850 | 1223 | 25 |
| neurogenesis | hippocampus   | parahippocampal gyrus                 | 2850 | 1052 | 6  |
| neurogenesis | hippocampus   | short term memory                     | 2850 | 1124 | 23 |
| neurogenesis | hippocampus   | globus pallidus                       | 2850 | 1092 | 14 |
| neurogenesis | hippocampus   | cingulate gyrus                       | 2850 | 1008 | 13 |
| neurogenesis | plasticity    | primary motor cortex                  | 1194 | 1286 | 25 |
| plasticity   | cerebellum    | fastigial nucleus                     | 1919 | 1574 | 28 |
| plasticity   | dopamine      | thyrotropin-releasing hormone         | 1587 | 1022 | 25 |
| plasticity   | serotonin     | obsessive compulsive disorder         | 1038 | 2023 | 25 |
| reward       | dopamine      | epinephrine                           | 3488 | 6710 | 25 |
| reward       | dopamine      | thyroid stimulating hormone           | 3488 | 1444 | 7  |
| reward       | dopamine      | adenohypophysis                       | 3488 | 1121 | 3  |
| reward       | dopamine      | somatostatin                          | 3488 | 1143 | 23 |
| reward       | dopamine      | thyrotropin-releasing hormone         | 3488 | 1022 | 7  |
| reward       | striatum      | Huntingtons disease                   | 1311 | 1495 | 20 |
| reward       | hypothalamus  | gonadotropin-releasing hormone        | 1191 | 6562 | 3  |
| reward       | hypothalamus  | adenohypophysis                       | 1191 | 3702 | 3  |
| reward       | hypothalamus  | thyroid stimulating hormone           | 1191 | 4405 | 7  |
| reward       | hypothalamus  | suprachiasmatic nucleus               | 1191 | 2814 | 19 |
| reward       | hypothalamus  | thyrotropin-releasing hormone         | 1191 | 2986 | 7  |
| reward       | hypothalamus  | posterior nucleus of the hypothalamus | 1191 | 2278 | 29 |

|                   |                   |                                         |      |      |    |
|-------------------|-------------------|-----------------------------------------|------|------|----|
| reward            | hypothalamus      | somatostatin                            | 1191 | 2780 | 23 |
| reward            | hypothalamus      | progesterone                            | 1191 | 3491 | 28 |
| reward            | hypothalamus      | dorsomedial nucleus of the hypothalamus | 1191 | 1649 | 26 |
| reward            | hypothalamus      | neurohypophysis                         | 1191 | 1471 | 3  |
| reward            | hypothalamus      | thyroid hormone                         | 1191 | 1555 | 2  |
| reward            | hypothalamus      | epinephrine                             | 1191 | 1838 | 25 |
| reward            | hypothalamus      | thyroxine                               | 1191 | 1491 | 3  |
| reward            | hypothalamus      | pineal body                             | 1191 | 1245 | 7  |
| reward            | hypothalamus      | melatonin                               | 1191 | 1197 | 14 |
| reward            | hypothalamus      | human growth hormone                    | 1191 | 1125 | 6  |
| reward            | hypothalamus      | triiodothyronine                        | 1191 | 1037 | 2  |
| rhythm            | hippocampus       | corpus callosum                         | 2262 | 1182 | 26 |
| rhythm            | hippocampus       | parahippocampal gyrus                   | 2262 | 1052 | 16 |
| rhythm            | epilepsy          | corpus callosum                         | 1234 | 1024 | 26 |
| rhythm            | anxiety           | social phobia                           | 1066 | 1828 | 7  |
| saccade           | vision            | diabetes                                | 1247 | 3678 | 24 |
| saccade           | vision            | AIDS                                    | 1247 | 1524 | 30 |
| short term memory | prefrontal cortex | nucleus accumbens                       | 1112 | 1800 | 30 |
| short term memory | visual perception | primary visual cortex                   | 1273 | 1014 | 19 |
| short term memory | hippocampus       | olfactory bulb                          | 1124 | 2197 | 17 |
| short term memory | hippocampus       | nucleus accumbens                       | 1124 | 2044 | 30 |
| short term memory | hippocampus       | substantia nigra                        | 1124 | 2108 | 15 |
| short term memory | hippocampus       | subiculum                               | 1124 | 1690 | 16 |
| short term memory | hippocampus       | raphe nuclei                            | 1124 | 1464 | 12 |
| short term memory | hippocampus       | pons                                    | 1124 | 1463 | 16 |
| short term memory | hippocampus       | locus ceruleus                          | 1124 | 1223 | 13 |
| short term memory | hippocampus       | globus pallidus                         | 1124 | 1092 | 25 |
| short term memory | hippocampus       | habenula                                | 1124 | 1105 | 8  |
| sleep             | hypothalamus      | stria terminalis                        | 2772 | 1673 | 26 |
| sleep             | hypothalamus      | stria terminalis                        | 2772 | 1673 | 26 |
| sleep             | hypothalamus      | neurohypophysis                         | 2772 | 1471 | 13 |
| sleep             | hippocampus       | subiculum                               | 1851 | 1690 | 22 |
| sleep             | hippocampus       | parahippocampal gyrus                   | 1851 | 1052 | 26 |
| somatosensation   | visual perception | visual search                           | 1388 | 1058 | 15 |
| somatosensation   | visual perception | primary visual cortex                   | 1388 | 1014 | 23 |
| spatial memory    | hippocampus       | olfactory bulb                          | 2009 | 2197 | 26 |
| spatial memory    | hippocampus       | nucleus accumbens                       | 2009 | 2044 | 27 |
| spatial memory    | hippocampus       | substantia nigra                        | 2009 | 2108 | 9  |
| spatial memory    | hippocampus       | putamen                                 | 2009 | 1890 | 7  |
| spatial memory    | hippocampus       | subiculum                               | 2009 | 1690 | 30 |
| spatial memory    | hippocampus       | caudate nucleus                         | 2009 | 1779 | 16 |
| spatial memory    | hippocampus       | raphe nuclei                            | 2009 | 1464 | 12 |
| spatial memory    | hippocampus       | pons                                    | 2009 | 1463 | 8  |
| spatial memory    | hippocampus       | locus ceruleus                          | 2009 | 1223 | 11 |

|                   |                   |                                         |      |       |    |
|-------------------|-------------------|-----------------------------------------|------|-------|----|
| spatial memory    | hippocampus       | corpus callosum                         | 2009 | 1182  | 11 |
| spatial memory    | hippocampus       | globus pallidus                         | 2009 | 1092  | 10 |
| spatial memory    | hippocampus       | adenosine                               | 2009 | 2648  | 26 |
| spatial memory    | hippocampus       | habenula                                | 2009 | 1105  | 3  |
| speech perception | AIDS              | HIV                                     | 1563 | 88266 | 2  |
| speech perception | AIDS              | diabetes                                | 1563 | 1339  | 6  |
| vision            | diabetes          | glucagon                                | 3678 | 8044  | 27 |
| vision            | diabetes          | vasopressin                             | 3678 | 2876  | 30 |
| vision            | diabetes          | aldosterone                             | 3678 | 1472  | 11 |
| vision            | aging             | dentate gyrus                           | 2240 | 1014  | 6  |
| visual perception | aging             | insulin                                 | 1148 | 6696  | 25 |
| visual perception | aging             | estrogen                                | 1148 | 4064  | 27 |
| visual perception | aging             | estradiol                               | 1148 | 2813  | 22 |
| visual perception | aging             | androgen                                | 1148 | 2445  | 12 |
| visual perception | aging             | adenosine                               | 1148 | 2436  | 13 |
| visual perception | aging             | glucocorticoid                          | 1148 | 1298  | 8  |
| visual perception | aging             | dentate gyrus                           | 1148 | 1014  | 14 |
| visual perception | aging             | progesterone                            | 1148 | 1303  | 18 |
| visual perception | aging             | thyroxine                               | 1148 | 1040  | 3  |
| visual perception | aging             | cortisol                                | 1148 | 1020  | 23 |
| visual search     | visual perception | primary visual cortex                   | 1058 | 1014  | 24 |
| working memory    | schizophrenia     | prolactin                               | 1383 | 1145  | 13 |
| working memory    | hippocampus       | olfactory bulb                          | 1391 | 2197  | 9  |
| working memory    | hippocampus       | subiculum                               | 1391 | 1690  | 24 |
| working memory    | hippocampus       | raphe nuclei                            | 1391 | 1464  | 17 |
| working memory    | hippocampus       | pons                                    | 1391 | 1463  | 14 |
| working memory    | hippocampus       | locus ceruleus                          | 1391 | 1223  | 21 |
| working memory    | hippocampus       | habenula                                | 1391 | 1105  | 7  |
| working memory    | aging             | androgen                                | 1033 | 2445  | 20 |
| working memory    | aging             | habenula                                | 1033 | 1355  | 7  |
| working memory    | aging             | progesterone                            | 1033 | 1303  | 25 |
| working memory    | aging             | thyroxine                               | 1033 | 1040  | 14 |
| acetylcholine     | serotonin         | obsessive compulsive disorder           | 6293 | 2023  | 12 |
| acetylcholine     | hippocampus       | parahippocampal gyrus                   | 3813 | 1052  | 14 |
| acetylcholine     | hypothalamus      | stria terminalis                        | 1237 | 1673  | 27 |
| acetylcholine     | hypothalamus      | stria terminalis                        | 1237 | 1673  | 27 |
| acetylcholine     | hypothalamus      | dorsomedial nucleus of the hypothalamus | 1237 | 1649  | 11 |
| acetylcholine     | hypothalamus      | anorexia                                | 1237 | 1379  | 27 |
| adenosine         | serotonin         | obsessive compulsive disorder           | 3423 | 2023  | 12 |
| adenosine         | hippocampus       | subiculum                               | 2648 | 1690  | 12 |
| adenosine         | hippocampus       | fornix                                  | 2648 | 1261  | 7  |
| adenosine         | hippocampus       | parahippocampal gyrus                   | 2648 | 1052  | 6  |
| adenosine         | hippocampus       | cingulate gyrus                         | 2648 | 1008  | 21 |
| adenosine         | dopamine          | medial prefrontal cortex                | 2576 | 1070  | 20 |

|             |                |                                         |      |      |    |
|-------------|----------------|-----------------------------------------|------|------|----|
| adenosine   | basal ganglia  | basal forebrain nucleus                 | 1121 | 1046 | 22 |
| adenosine   | cerebellum     | dentate nucleus                         | 1182 | 2398 | 11 |
| adenosine   | cerebellum     | fastigial nucleus                       | 1182 | 1574 | 7  |
| adenosine   | cerebellum     | vestibular nuclei                       | 1182 | 1311 | 22 |
| adenosine   | cerebellum     | hydrocephalus                           | 1182 | 1555 | 30 |
| adenosine   | cerebellum     | inferior olive                          | 1182 | 1124 | 7  |
| adenosine   | stroke         | aphasia                                 | 1240 | 1803 | 4  |
| aldosterone | vasopressin    | neurohypophysis                         | 2044 | 1332 | 30 |
| aldosterone | norepinephrine | locus ceruleus                          | 2101 | 2838 | 13 |
| aldosterone | norepinephrine | striatum                                | 2101 | 2686 | 20 |
| aldosterone | norepinephrine | basal ganglia                           | 2101 | 1839 | 11 |
| aldosterone | norepinephrine | habenula                                | 2101 | 1424 | 20 |
| aldosterone | norepinephrine | tryptophan                              | 2101 | 1064 | 29 |
| aldosterone | insulin        | coma                                    | 1357 | 1983 | 27 |
| aldosterone | insulin        | HIV                                     | 1357 | 1329 | 25 |
| aldosterone | diabetes       | coma                                    | 1472 | 3579 | 27 |
| aldosterone | diabetes       | dementia                                | 1472 | 1605 | 13 |
| aldosterone | diabetes       | HIV                                     | 1472 | 2092 | 25 |
| aldosterone | diabetes       | Alzheimers disease                      | 1472 | 1497 | 9  |
| aldosterone | diabetes       | multiple sclerosis                      | 1472 | 1151 | 11 |
| aldosterone | diabetes       | AIDS                                    | 1472 | 1339 | 30 |
| aldosterone | diabetes       | schizophrenia                           | 1472 | 1085 | 14 |
| aldosterone | diabetes       | epilepsy                                | 1472 | 1031 | 18 |
| androgen    | hypothalamus   | posterior nucleus of the hypothalamus   | 2355 | 2278 | 28 |
| androgen    | hypothalamus   | pons                                    | 2355 | 2065 | 14 |
| androgen    | hypothalamus   | locus ceruleus                          | 2355 | 1814 | 15 |
| androgen    | hypothalamus   | raphe nuclei                            | 2355 | 1769 | 18 |
| androgen    | hypothalamus   | dorsomedial nucleus of the hypothalamus | 2355 | 1649 | 28 |
| androgen    | hypothalamus   | nucleus accumbens                       | 2355 | 1598 | 27 |
| androgen    | hypothalamus   | substantia nigra                        | 2355 | 1690 | 20 |
| androgen    | hypothalamus   | neurohypophysis                         | 2355 | 1471 | 18 |
| androgen    | hypothalamus   | solitary nucleus                        | 2355 | 1208 | 5  |
| androgen    | hypothalamus   | periaqueductal                          | 2355 | 1157 | 13 |
| androgen    | hypothalamus   | caudate nucleus                         | 2355 | 1220 | 7  |
| androgen    | hypothalamus   | enkephalin                              | 2355 | 1223 | 18 |
| androgen    | hypothalamus   | medial dorsal nucleus                   | 2355 | 1052 | 15 |
| androgen    | insulin        | coma                                    | 3213 | 1983 | 5  |
| androgen    | aging          | Parkinsons disease                      | 2445 | 1533 | 27 |
| androgen    | aging          | dentate gyrus                           | 2445 | 1014 | 23 |
| BDNF        | hippocampus    | subiculum                               | 2445 | 1690 | 9  |
| BDNF        | hippocampus    | caudate nucleus                         | 2445 | 1779 | 19 |
| BDNF        | hippocampus    | amnesia                                 | 2445 | 1611 | 17 |
| BDNF        | hippocampus    | pons                                    | 2445 | 1463 | 20 |
| BDNF        | hippocampus    | fornix                                  | 2445 | 1261 | 12 |

|                                 |                |                                         |      |      |    |
|---------------------------------|----------------|-----------------------------------------|------|------|----|
| BDNF                            | hippocampus    | corpus callosum                         | 2445 | 1182 | 14 |
| BDNF                            | hippocampus    | parahippocampal gyrus                   | 2445 | 1052 | 7  |
| BDNF                            | hippocampus    | globus pallidus                         | 2445 | 1092 | 13 |
| BDNF                            | hippocampus    | cingulate gyrus                         | 2445 | 1008 | 22 |
| corticotropin-releasing hormone | hypothalamus   | substantia nigra                        | 5421 | 1690 | 27 |
| corticotropin-releasing hormone | hypothalamus   | caudate nucleus                         | 5421 | 1220 | 23 |
| corticotropin-releasing hormone | hypothalamus   | pineal body                             | 5421 | 1245 | 17 |
| cortisol                        | hypothalamus   | posterior nucleus of the hypothalamus   | 5062 | 2278 | 6  |
| cortisol                        | hypothalamus   | pons                                    | 5062 | 2065 | 6  |
| cortisol                        | hypothalamus   | basal ganglia                           | 5062 | 2664 | 24 |
| cortisol                        | hypothalamus   | locus ceruleus                          | 5062 | 1814 | 23 |
| cortisol                        | hypothalamus   | raphe nuclei                            | 5062 | 1769 | 24 |
| cortisol                        | hypothalamus   | stria terminalis                        | 5062 | 1673 | 8  |
| cortisol                        | hypothalamus   | stria terminalis                        | 5062 | 1673 | 8  |
| cortisol                        | hypothalamus   | dorsomedial nucleus of the hypothalamus | 5062 | 1649 | 1  |
| cortisol                        | hypothalamus   | nucleus accumbens                       | 5062 | 1598 | 7  |
| cortisol                        | hypothalamus   | substantia nigra                        | 5062 | 1690 | 6  |
| cortisol                        | hypothalamus   | olfactory bulb                          | 5062 | 1494 | 7  |
| cortisol                        | hypothalamus   | solitary nucleus                        | 5062 | 1208 | 2  |
| cortisol                        | hypothalamus   | periaqueductal                          | 5062 | 1157 | 3  |
| cortisol                        | hypothalamus   | caudate nucleus                         | 5062 | 1220 | 17 |
| cortisol                        | hypothalamus   | medial dorsal nucleus                   | 5062 | 1052 | 2  |
| cortisol                        | hypothalamus   | habenula                                | 5062 | 1297 | 20 |
| cortisol                        | norepinephrine | locus ceruleus                          | 2585 | 2838 | 23 |
| cortisol                        | norepinephrine | basal ganglia                           | 2585 | 1839 | 24 |
| cortisol                        | norepinephrine | habenula                                | 2585 | 1424 | 20 |
| cortisol                        | anxiety        | social phobia                           | 1476 | 1828 | 21 |
| cortisol                        | sleep          | narcolepsy                              | 1277 | 2349 | 15 |
| cortisol                        | sleep          | pons                                    | 1277 | 1017 | 6  |
| cortisol                        | serotonin      | raphe nuclei                            | 1061 | 4534 | 24 |
| cortisol                        | serotonin      | basal ganglia                           | 1061 | 3215 | 24 |
| cortisol                        | serotonin      | nucleus accumbens                       | 1061 | 1570 | 7  |
| cortisol                        | serotonin      | substantia nigra                        | 1061 | 1313 | 6  |
| cortisol                        | serotonin      | habenula                                | 1061 | 1382 | 20 |
| cortisol                        | aging          | basal ganglia                           | 1020 | 1556 | 24 |
| cortisol                        | aging          | habenula                                | 1020 | 1355 | 20 |
| cortisol                        | aging          | dentate gyrus                           | 1020 | 1014 | 29 |
| dopamine                        | hippocampus    | parahippocampal gyrus                   | 4450 | 1052 | 25 |
| dopamine                        | cerebellum     | inferior olive                          | 2469 | 1124 | 23 |
| dopamine                        | anxiety        | social phobia                           | 1810 | 1828 | 30 |
| enkephalin                      | somatostatin   | human growth hormone                    | 1080 | 1119 | 17 |
| enkephalin                      | basal ganglia  | primary motor cortex                    | 1029 | 1125 | 21 |
| enkephalin                      | basal ganglia  | dementia                                | 1029 | 1856 | 21 |
| enkephalin                      | basal ganglia  | stroke                                  | 1029 | 1128 | 25 |

|             |                              |                                          |      |       |    |
|-------------|------------------------------|------------------------------------------|------|-------|----|
| enkephalin  | hypothalamus                 | thyroid hormone                          | 1223 | 1555  | 19 |
| enkephalin  | hypothalamus                 | anorexia                                 | 1223 | 1379  | 9  |
| enkephalin  | hypothalamus                 | thyroxine                                | 1223 | 1491  | 16 |
| enkephalin  | hypothalamus                 | pineal body                              | 1223 | 1245  | 28 |
| enkephalin  | hypothalamus                 | human growth hormone                     | 1223 | 1125  | 17 |
| enkephalin  | hypothalamus                 | triiodothyronine                         | 1223 | 1037  | 21 |
| enkephalin  | dopamine                     | attention deficit hyperactivity disorder | 1234 | 1776  | 18 |
| enkephalin  | dopamine                     | medial prefrontal cortex                 | 1234 | 1070  | 18 |
| enkephalin  | dopamine                     | dementia                                 | 1234 | 1144  | 21 |
| epinephrine | dopamine                     | ventral tegmental area                   | 6710 | 3348  | 20 |
| epinephrine | dopamine                     | putamen                                  | 6710 | 3443  | 25 |
| epinephrine | dopamine                     | globus pallidus                          | 6710 | 1535  | 15 |
| epinephrine | dopamine                     | medial prefrontal cortex                 | 6710 | 1070  | 10 |
| epinephrine | serotonin                    | obsessive compulsive disorder            | 3617 | 2023  | 16 |
| epinephrine | hypothalamus                 | suprachiasmatic nucleus                  | 1838 | 2814  | 14 |
| epinephrine | hypothalamus                 | stria terminalis                         | 1838 | 1673  | 19 |
| epinephrine | hypothalamus                 | stria terminalis                         | 1838 | 1673  | 19 |
| epinephrine | hypothalamus                 | dorsomedial nucleus of the hypothalamus  | 1838 | 1649  | 30 |
| epinephrine | hypothalamus                 | periaqueductal                           | 1838 | 1157  | 22 |
| epinephrine | hypothalamus                 | medial dorsal nucleus                    | 1838 | 1052  | 11 |
| epinephrine | rhythm                       | suprachiasmatic nucleus                  | 1184 | 3521  | 14 |
| epinephrine | diabetes                     | multiple sclerosis                       | 1847 | 1151  | 28 |
| estradiol   | hypothalamus                 | medial dorsal nucleus                    | 6308 | 1052  | 27 |
| estradiol   | inferior cerebellar peduncle | corpus callosum                          | 2841 | 12574 | 17 |
| estradiol   | inferior cerebellar peduncle | globus pallidus                          | 2841 | 1473  | 14 |
| estradiol   | subthalamic nucleus          | corpus callosum                          | 2841 | 12574 | 17 |
| estradiol   | subthalamic nucleus          | globus pallidus                          | 2841 | 2536  | 14 |
| estradiol   | insulin                      | coma                                     | 4848 | 1983  | 18 |
| estradiol   | dopamine                     | addiction                                | 1574 | 2044  | 24 |
| estradiol   | dopamine                     | globus pallidus                          | 1574 | 1535  | 14 |
| estradiol   | dopamine                     | medial prefrontal cortex                 | 1574 | 1070  | 15 |
| estradiol   | hippocampus                  | entorhinal area                          | 1162 | 4249  | 27 |
| estradiol   | hippocampus                  | subiculum                                | 1162 | 1690  | 12 |
| estradiol   | hippocampus                  | amnesia                                  | 1162 | 1611  | 9  |
| estradiol   | hippocampus                  | fornix                                   | 1162 | 1261  | 22 |
| estradiol   | hippocampus                  | corpus callosum                          | 1162 | 1182  | 17 |
| estradiol   | hippocampus                  | parahippocampal gyrus                    | 1162 | 1052  | 0  |
| estradiol   | hippocampus                  | globus pallidus                          | 1162 | 1092  | 14 |
| estradiol   | hippocampus                  | cingulate gyrus                          | 1162 | 1008  | 18 |
| estradiol   | diabetes                     | coma                                     | 1025 | 3579  | 18 |
| estrogen    | insulin                      | coma                                     | 4458 | 1983  | 18 |
| estrogen    | inferior cerebellar peduncle | corpus callosum                          | 1955 | 12574 | 27 |
| estrogen    | inferior cerebellar peduncle | globus pallidus                          | 1955 | 1473  | 22 |
| estrogen    | subthalamic nucleus          | corpus callosum                          | 1958 | 12574 | 27 |



|                |                     |                                         |       |      |    |
|----------------|---------------------|-----------------------------------------|-------|------|----|
| estrogen       | subthalamic nucleus | globus pallidus                         | 1958  | 2536 | 22 |
| estrogen       | dopamine            | globus pallidus                         | 1496  | 1535 | 22 |
| estrogen       | dopamine            | medial prefrontal cortex                | 1496  | 1070 | 18 |
| estrogen       | hippocampus         | subiculum                               | 1293  | 1690 | 19 |
| estrogen       | hippocampus         | amnesia                                 | 1293  | 1611 | 8  |
| estrogen       | hippocampus         | fornix                                  | 1293  | 1261 | 24 |
| estrogen       | hippocampus         | corpus callosum                         | 1293  | 1182 | 27 |
| estrogen       | hippocampus         | parahippocampal gyrus                   | 1293  | 1052 | 6  |
| estrogen       | hippocampus         | globus pallidus                         | 1293  | 1092 | 22 |
| estrogen       | hippocampus         | cingulate gyrus                         | 1293  | 1008 | 23 |
| estrogen       | diabetes            | coma                                    | 2296  | 3579 | 18 |
| estrogen       | stroke              | aphasia                                 | 1209  | 1803 | 9  |
| estrogen       | stroke              | coma                                    | 1209  | 1022 | 18 |
| estrogen       | serotonin           | obsessive compulsive disorder           | 1034  | 2023 | 21 |
| GABA           | hippocampus         | parahippocampal gyrus                   | 8191  | 1052 | 22 |
| GABA           | cerebellum          | hydrocephalus                           | 4077  | 1555 | 14 |
| GABA           | anxiety             | social phobia                           | 3481  | 1828 | 27 |
| GABA           | adenosine           | parathyroid hormone                     | 1468  | 1064 | 13 |
| glucagon       | insulin             | HIV                                     | 19604 | 1329 | 21 |
| glucagon       | diabetes            | dementia                                | 8044  | 1605 | 13 |
| glucagon       | diabetes            | HIV                                     | 8044  | 2092 | 21 |
| glucagon       | diabetes            | multiple sclerosis                      | 8044  | 1151 | 9  |
| glucagon       | diabetes            | AIDS                                    | 8044  | 1339 | 19 |
| glucagon       | diabetes            | schizophrenia                           | 8044  | 1085 | 14 |
| glucagon       | diabetes            | epilepsy                                | 8044  | 1031 | 23 |
| glucagon       | norepinephrine      | locus ceruleus                          | 1762  | 2838 | 2  |
| glucagon       | norepinephrine      | striatum                                | 1762  | 2686 | 9  |
| glucagon       | norepinephrine      | basal ganglia                           | 1762  | 1839 | 13 |
| glucagon       | adenosine           | striatum                                | 1343  | 1473 | 9  |
| glucagon       | adenosine           | basal ganglia                           | 1343  | 1121 | 13 |
| glucocorticoid | hypothalamus        | posterior nucleus of the hypothalamus   | 4114  | 2278 | 22 |
| glucocorticoid | hypothalamus        | dorsomedial nucleus of the hypothalamus | 4114  | 1649 | 18 |
| glucocorticoid | hypothalamus        | solitary nucleus                        | 4114  | 1208 | 30 |
| glucocorticoid | hypothalamus        | periaqueductal                          | 4114  | 1157 | 13 |
| glucocorticoid | hypothalamus        | caudate nucleus                         | 4114  | 1220 | 26 |
| glucocorticoid | hypothalamus        | medial dorsal nucleus                   | 4114  | 1052 | 5  |
| glucocorticoid | hippocampus         | putamen                                 | 2369  | 1890 | 24 |
| glucocorticoid | hippocampus         | subiculum                               | 2369  | 1690 | 30 |
| glucocorticoid | hippocampus         | caudate nucleus                         | 2369  | 1779 | 26 |
| glucocorticoid | hippocampus         | amnesia                                 | 2369  | 1611 | 27 |
| glucocorticoid | hippocampus         | fornix                                  | 2369  | 1261 | 19 |
| glucocorticoid | hippocampus         | corpus callosum                         | 2369  | 1182 | 21 |
| glucocorticoid | hippocampus         | parahippocampal gyrus                   | 2369  | 1052 | 2  |
| glucocorticoid | hippocampus         | globus pallidus                         | 2369  | 1092 | 14 |

|                                |              |                                         |       |      |    |
|--------------------------------|--------------|-----------------------------------------|-------|------|----|
| glucocorticoid                 | hippocampus  | cingulate gyrus                         | 2369  | 1008 | 11 |
| glutamate                      | hippocampus  | parahippocampal gyrus                   | 11478 | 1052 | 25 |
| glutamate                      | stroke       | aphasia                                 | 1166  | 1803 | 8  |
| gonadotropin-releasing hormone | hypothalamus | striatum                                | 6562  | 4156 | 29 |
| gonadotropin-releasing hormone | hypothalamus | pons                                    | 6562  | 2065 | 8  |
| gonadotropin-releasing hormone | hypothalamus | basal ganglia                           | 6562  | 2664 | 26 |
| gonadotropin-releasing hormone | hypothalamus | locus ceruleus                          | 6562  | 1814 | 27 |
| gonadotropin-releasing hormone | hypothalamus | raphe nuclei                            | 6562  | 1769 | 19 |
| gonadotropin-releasing hormone | hypothalamus | nucleus accumbens                       | 6562  | 1598 | 19 |
| gonadotropin-releasing hormone | hypothalamus | substantia nigra                        | 6562  | 1690 | 10 |
| gonadotropin-releasing hormone | hypothalamus | solitary nucleus                        | 6562  | 1208 | 8  |
| gonadotropin-releasing hormone | hypothalamus | periaqueductal                          | 6562  | 1157 | 22 |
| gonadotropin-releasing hormone | hypothalamus | caudate nucleus                         | 6562  | 1220 | 13 |
| gonadotropin-releasing hormone | hypothalamus | medial dorsal nucleus                   | 6562  | 1052 | 25 |
| gonadotropin-releasing hormone | prolactin    | schizophrenia                           | 2216  | 1145 | 22 |
| gonadotropin-releasing hormone | estrogen     | stroke                                  | 3442  | 1209 | 13 |
| histamine                      | serotonin    | obsessive compulsive disorder           | 7488  | 2023 | 9  |
| histamine                      | dopamine     | ventral tegmental area                  | 1765  | 3348 | 12 |
| histamine                      | dopamine     | addiction                               | 1765  | 2044 | 29 |
| histamine                      | dopamine     | globus pallidus                         | 1765  | 1535 | 30 |
| histamine                      | dopamine     | medial prefrontal cortex                | 1765  | 1070 | 4  |
| histamine                      | hypothalamus | stria terminalis                        | 1258  | 1673 | 9  |
| histamine                      | hypothalamus | stria terminalis                        | 1258  | 1673 | 9  |
| histamine                      | hypothalamus | dorsomedial nucleus of the hypothalamus | 1258  | 1649 | 14 |
| histamine                      | hypothalamus | solitary nucleus                        | 1258  | 1208 | 22 |
| histamine                      | hypothalamus | periaqueductal                          | 1258  | 1157 | 29 |
| histamine                      | hypothalamus | medial dorsal nucleus                   | 1258  | 1052 | 11 |
| histamine                      | hypothalamus | human growth hormone                    | 1258  | 1125 | 15 |
| human growth hormone           | insulin      | coma                                    | 6851  | 1983 | 24 |
| human growth hormone           | hypothalamus | amygdala                                | 1125  | 6179 | 14 |
| human growth hormone           | hypothalamus | thalamus                                | 1125  | 5006 | 16 |
| human growth hormone           | hypothalamus | striatum                                | 1125  | 4156 | 9  |
| human growth hormone           | hypothalamus | suprachiasmatic nucleus                 | 1125  | 2814 | 6  |
| human growth hormone           | hypothalamus | posterior nucleus of the hypothalamus   | 1125  | 2278 | 5  |
| human growth hormone           | hypothalamus | pons                                    | 1125  | 2065 | 1  |
| human growth hormone           | hypothalamus | basal ganglia                           | 1125  | 2664 | 18 |
| human growth hormone           | hypothalamus | septum                                  | 1125  | 2354 | 30 |
| human growth hormone           | hypothalamus | locus ceruleus                          | 1125  | 1814 | 6  |
| human growth hormone           | hypothalamus | raphe nuclei                            | 1125  | 1769 | 2  |
| human growth hormone           | hypothalamus | stria terminalis                        | 1125  | 1673 | 1  |
| human growth hormone           | hypothalamus | stria terminalis                        | 1125  | 1673 | 1  |
| human growth hormone           | hypothalamus | dorsomedial nucleus of the hypothalamus | 1125  | 1649 | 3  |
| human growth hormone           | hypothalamus | nucleus accumbens                       | 1125  | 1598 | 4  |
| human growth hormone           | hypothalamus | substantia nigra                        | 1125  | 1690 | 3  |

|                      |              |                                         |      |      |    |
|----------------------|--------------|-----------------------------------------|------|------|----|
| human growth hormone | hypothalamus | olfactory bulb                          | 1125 | 1494 | 8  |
| human growth hormone | hypothalamus | solitary nucleus                        | 1125 | 1208 | 2  |
| human growth hormone | hypothalamus | periaqueductal                          | 1125 | 1157 | 0  |
| human growth hormone | hypothalamus | caudate nucleus                         | 1125 | 1220 | 5  |
| human growth hormone | hypothalamus | medial dorsal nucleus                   | 1125 | 1052 | 4  |
| human growth hormone | hypothalamus | habenula                                | 1125 | 1297 | 13 |
| human growth hormone | hypothalamus | seizure                                 | 1125 | 1157 | 28 |
| human growth hormone | diabetes     | coma                                    | 1043 | 3579 | 24 |
| human growth hormone | diabetes     | dementia                                | 1043 | 1605 | 24 |
| human growth hormone | diabetes     | Alzheimers disease                      | 1043 | 1497 | 28 |
| human growth hormone | diabetes     | multiple sclerosis                      | 1043 | 1151 | 5  |
| human growth hormone | diabetes     | epilepsy                                | 1043 | 1031 | 24 |
| insulin              | hypothalamus | posterior nucleus of the hypothalamus   | 5671 | 2278 | 25 |
| insulin              | hypothalamus | stria terminalis                        | 5671 | 1673 | 24 |
| insulin              | hypothalamus | stria terminalis                        | 5671 | 1673 | 24 |
| insulin              | hypothalamus | periaqueductal                          | 5671 | 1157 | 15 |
| insulin              | alcoholism   | antisocial personality disorder         | 1695 | 1206 | 18 |
| insulin              | stroke       | aphasia                                 | 1820 | 1803 | 13 |
| insulin              | sleep        | narcolepsy                              | 1284 | 2349 | 17 |
| insulin              | serotonin    | obsessive compulsive disorder           | 1239 | 2023 | 18 |
| insulin              | dopamine     | globus pallidus                         | 1230 | 1535 | 21 |
| insulin              | dopamine     | medial prefrontal cortex                | 1230 | 1070 | 5  |
| melatonin            | sleep        | narcolepsy                              | 2325 | 2349 | 30 |
| melatonin            | sleep        | pons                                    | 2325 | 1017 | 29 |
| melatonin            | serotonin    | obsessive compulsive disorder           | 2012 | 2023 | 12 |
| melatonin            | serotonin    | prefrontal cortex                       | 2012 | 1754 | 17 |
| melatonin            | serotonin    | nucleus accumbens                       | 2012 | 1570 | 29 |
| melatonin            | hypothalamus | posterior nucleus of the hypothalamus   | 1197 | 2278 | 4  |
| melatonin            | hypothalamus | pons                                    | 1197 | 2065 | 29 |
| melatonin            | hypothalamus | septum                                  | 1197 | 2354 | 13 |
| melatonin            | hypothalamus | locus ceruleus                          | 1197 | 1814 | 17 |
| melatonin            | hypothalamus | stria terminalis                        | 1197 | 1673 | 8  |
| melatonin            | hypothalamus | stria terminalis                        | 1197 | 1673 | 8  |
| melatonin            | hypothalamus | dorsomedial nucleus of the hypothalamus | 1197 | 1649 | 16 |
| melatonin            | hypothalamus | nucleus accumbens                       | 1197 | 1598 | 29 |
| melatonin            | hypothalamus | neurohypophysis                         | 1197 | 1471 | 19 |
| melatonin            | hypothalamus | olfactory bulb                          | 1197 | 1494 | 22 |
| melatonin            | hypothalamus | solitary nucleus                        | 1197 | 1208 | 3  |
| melatonin            | hypothalamus | periaqueductal                          | 1197 | 1157 | 8  |
| melatonin            | hypothalamus | caudate nucleus                         | 1197 | 1220 | 14 |
| melatonin            | hypothalamus | medial dorsal nucleus                   | 1197 | 1052 | 8  |
| norepinephrine       | hippocampus  | subiculum                               | 3442 | 1690 | 22 |
| norepinephrine       | hippocampus  | parahippocampal gyrus                   | 3442 | 1052 | 9  |
| norepinephrine       | cerebellum   | dentate nucleus                         | 1593 | 2398 | 27 |

|                     |                              |                                         |      |       |    |
|---------------------|------------------------------|-----------------------------------------|------|-------|----|
| norepinephrine      | cerebellum                   | fastigial nucleus                       | 1593 | 1574  | 17 |
| norepinephrine      | cerebellum                   | hydrocephalus                           | 1593 | 1555  | 29 |
| norepinephrine      | cerebellum                   | inferior olive                          | 1593 | 1124  | 16 |
| norepinephrine      | stroke                       | aphasia                                 | 1527 | 1803  | 14 |
| oxytocin            | hypothalamus                 | pons                                    | 3209 | 2065  | 23 |
| oxytocin            | hypothalamus                 | basal ganglia                           | 3209 | 2664  | 30 |
| oxytocin            | hypothalamus                 | substantia nigra                        | 3209 | 1690  | 25 |
| oxytocin            | hypothalamus                 | periaqueductal                          | 3209 | 1157  | 29 |
| oxytocin            | hypothalamus                 | caudate nucleus                         | 3209 | 1220  | 21 |
| oxytocin            | hypothalamus                 | medial dorsal nucleus                   | 3209 | 1052  | 30 |
| oxytocin            | hypothalamus                 | triiodothyronine                        | 3209 | 1037  | 27 |
| oxytocin            | estrogen                     | stroke                                  | 1032 | 1209  | 24 |
| parathyroid hormone | insulin                      | coma                                    | 1534 | 1983  | 23 |
| parathyroid hormone | adenosine                    | hippocampus                             | 1064 | 2648  | 19 |
| parathyroid hormone | adenosine                    | striatum                                | 1064 | 1473  | 6  |
| parathyroid hormone | adenosine                    | inferior cerebellar peduncle            | 1064 | 1275  | 13 |
| parathyroid hormone | adenosine                    | subthalamic nucleus                     | 1064 | 1288  | 13 |
| progesterone        | inferior cerebellar peduncle | corpus callosum                         | 6621 | 12574 | 10 |
| progesterone        | inferior cerebellar peduncle | putamen                                 | 6621 | 2253  | 27 |
| progesterone        | inferior cerebellar peduncle | caudate nucleus                         | 6621 | 2052  | 29 |
| progesterone        | inferior cerebellar peduncle | Parkinsons disease                      | 6621 | 2716  | 16 |
| progesterone        | inferior cerebellar peduncle | globus pallidus                         | 6621 | 1473  | 4  |
| progesterone        | subthalamic nucleus          | corpus callosum                         | 6622 | 12574 | 10 |
| progesterone        | subthalamic nucleus          | Parkinsons disease                      | 6622 | 4381  | 16 |
| progesterone        | subthalamic nucleus          | putamen                                 | 6622 | 2452  | 27 |
| progesterone        | subthalamic nucleus          | globus pallidus                         | 6622 | 2536  | 4  |
| progesterone        | subthalamic nucleus          | caudate nucleus                         | 6622 | 2153  | 29 |
| progesterone        | hypothalamus                 | posterior nucleus of the hypothalamus   | 3491 | 2278  | 30 |
| progesterone        | hypothalamus                 | pons                                    | 3491 | 2065  | 23 |
| progesterone        | hypothalamus                 | locus ceruleus                          | 3491 | 1814  | 20 |
| progesterone        | hypothalamus                 | dorsomedial nucleus of the hypothalamus | 3491 | 1649  | 30 |
| progesterone        | hypothalamus                 | solitary nucleus                        | 3491 | 1208  | 13 |
| progesterone        | hypothalamus                 | caudate nucleus                         | 3491 | 1220  | 29 |
| progesterone        | hypothalamus                 | medial dorsal nucleus                   | 3491 | 1052  | 24 |
| progesterone        | insulin                      | coma                                    | 3046 | 1983  | 18 |
| progesterone        | aging                        | Parkinsons disease                      | 1303 | 1533  | 16 |
| prolactin           | hypothalamus                 | pons                                    | 5769 | 2065  | 22 |
| prolactin           | hypothalamus                 | locus ceruleus                          | 5769 | 1814  | 29 |
| prolactin           | hypothalamus                 | solitary nucleus                        | 5769 | 1208  | 29 |
| prolactin           | hypothalamus                 | periaqueductal                          | 5769 | 1157  | 12 |
| prolactin           | dopamine                     | ventral tegmental area                  | 5400 | 3348  | 12 |
| prolactin           | dopamine                     | putamen                                 | 5400 | 3443  | 26 |
| prolactin           | dopamine                     | prefrontal cortex                       | 5400 | 3695  | 28 |
| prolactin           | dopamine                     | globus pallidus                         | 5400 | 1535  | 12 |

|                 |                              |                                         |      |       |    |
|-----------------|------------------------------|-----------------------------------------|------|-------|----|
| prolactin       | dopamine                     | locus ceruleus                          | 5400 | 1221  | 29 |
| prolactin       | dopamine                     | medial prefrontal cortex                | 5400 | 1070  | 2  |
| prolactin       | serotonin                    | prefrontal cortex                       | 1902 | 1754  | 28 |
| prolactin       | inferior cerebellar peduncle | corpus callosum                         | 1220 | 12574 | 9  |
| prolactin       | inferior cerebellar peduncle | putamen                                 | 1220 | 2253  | 26 |
| prolactin       | inferior cerebellar peduncle | globus pallidus                         | 1220 | 1473  | 12 |
| prolactin       | subthalamic nucleus          | corpus callosum                         | 1220 | 12574 | 9  |
| prolactin       | subthalamic nucleus          | putamen                                 | 1220 | 2452  | 26 |
| prolactin       | subthalamic nucleus          | globus pallidus                         | 1220 | 2536  | 12 |
| prolactin       | subthalamic nucleus          | prefrontal cortex                       | 1220 | 1064  | 28 |
| prolactin       | schizophrenia                | prefrontal cortex                       | 1145 | 2857  | 28 |
| prolactin       | schizophrenia                | autism                                  | 1145 | 1606  | 29 |
| prolactin       | norepinephrine               | locus ceruleus                          | 1154 | 2838  | 29 |
| serotonin       | hippocampus                  | parahippocampal gyrus                   | 6260 | 1052  | 30 |
| somatostatin    | insulin                      | coma                                    | 5969 | 1983  | 24 |
| somatostatin    | insulin                      | stroke                                  | 5969 | 1820  | 23 |
| somatostatin    | serotonin                    | migraine                                | 1263 | 2943  | 20 |
| somatostatin    | serotonin                    | obsessive compulsive disorder           | 1263 | 2023  | 8  |
| somatostatin    | dopamine                     | ventral tegmental area                  | 1143 | 3348  | 29 |
| somatostatin    | dopamine                     | addiction                               | 1143 | 2044  | 12 |
| somatostatin    | dopamine                     | medial prefrontal cortex                | 1143 | 1070  | 5  |
| somatostatin    | diabetes                     | stroke                                  | 1733 | 10567 | 23 |
| somatostatin    | diabetes                     | coma                                    | 1733 | 3579  | 24 |
| somatostatin    | diabetes                     | multiple sclerosis                      | 1733 | 1151  | 27 |
| testosterone    | hypothalamus                 | pons                                    | 4634 | 2065  | 23 |
| testosterone    | hypothalamus                 | locus ceruleus                          | 4634 | 1814  | 23 |
| testosterone    | hypothalamus                 | raphe nuclei                            | 4634 | 1769  | 19 |
| testosterone    | hypothalamus                 | dorsomedial nucleus of the hypothalamus | 4634 | 1649  | 30 |
| testosterone    | hypothalamus                 | solitary nucleus                        | 4634 | 1208  | 4  |
| testosterone    | hypothalamus                 | periaqueductal                          | 4634 | 1157  | 15 |
| testosterone    | hypothalamus                 | caudate nucleus                         | 4634 | 1220  | 21 |
| testosterone    | hypothalamus                 | medial dorsal nucleus                   | 4634 | 1052  | 13 |
| testosterone    | insulin                      | coma                                    | 4574 | 1983  | 21 |
| testosterone    | diabetes                     | coma                                    | 1517 | 3579  | 21 |
| thyroid hormone | hypothalamus                 | suprachiasmatic nucleus                 | 1555 | 2814  | 15 |
| thyroid hormone | hypothalamus                 | posterior nucleus of the hypothalamus   | 1555 | 2278  | 16 |
| thyroid hormone | hypothalamus                 | pons                                    | 1555 | 2065  | 10 |
| thyroid hormone | hypothalamus                 | locus ceruleus                          | 1555 | 1814  | 15 |
| thyroid hormone | hypothalamus                 | raphe nuclei                            | 1555 | 1769  | 12 |
| thyroid hormone | hypothalamus                 | stria terminalis                        | 1555 | 1673  | 4  |
| thyroid hormone | hypothalamus                 | stria terminalis                        | 1555 | 1673  | 4  |
| thyroid hormone | hypothalamus                 | dorsomedial nucleus of the hypothalamus | 1555 | 1649  | 17 |
| thyroid hormone | hypothalamus                 | nucleus accumbens                       | 1555 | 1598  | 13 |
| thyroid hormone | hypothalamus                 | substantia nigra                        | 1555 | 1690  | 17 |

|                               |              |                                          |      |       |    |
|-------------------------------|--------------|------------------------------------------|------|-------|----|
| thyroid hormone               | hypothalamus | neurohypophysis                          | 1555 | 1471  | 26 |
| thyroid hormone               | hypothalamus | solitary nucleus                         | 1555 | 1208  | 2  |
| thyroid hormone               | hypothalamus | periaqueductal                           | 1555 | 1157  | 2  |
| thyroid hormone               | hypothalamus | caudate nucleus                          | 1555 | 1220  | 13 |
| thyroid hormone               | hypothalamus | medial dorsal nucleus                    | 1555 | 1052  | 14 |
| thyroid stimulating hormone   | hypothalamus | locus ceruleus                           | 4405 | 1814  | 27 |
| thyroid stimulating hormone   | hypothalamus | stria terminalis                         | 4405 | 1673  | 15 |
| thyroid stimulating hormone   | hypothalamus | stria terminalis                         | 4405 | 1673  | 15 |
| thyroid stimulating hormone   | hypothalamus | substantia nigra                         | 4405 | 1690  | 26 |
| thyroid stimulating hormone   | hypothalamus | periaqueductal                           | 4405 | 1157  | 30 |
| thyroid stimulating hormone   | dopamine     | substantia nigra                         | 1444 | 9657  | 26 |
| thyroid stimulating hormone   | dopamine     | ventral tegmental area                   | 1444 | 3348  | 12 |
| thyroid stimulating hormone   | dopamine     | putamen                                  | 1444 | 3443  | 16 |
| thyroid stimulating hormone   | dopamine     | prefrontal cortex                        | 1444 | 3695  | 14 |
| thyroid stimulating hormone   | dopamine     | addiction                                | 1444 | 2044  | 10 |
| thyroid stimulating hormone   | dopamine     | globus pallidus                          | 1444 | 1535  | 17 |
| thyroid stimulating hormone   | dopamine     | locus ceruleus                           | 1444 | 1221  | 27 |
| thyroid stimulating hormone   | dopamine     | medial prefrontal cortex                 | 1444 | 1070  | 1  |
| thyrotropin-releasing hormone | hypothalamus | locus ceruleus                           | 2986 | 1814  | 21 |
| thyrotropin-releasing hormone | hypothalamus | stria terminalis                         | 2986 | 1673  | 13 |
| thyrotropin-releasing hormone | hypothalamus | stria terminalis                         | 2986 | 1673  | 13 |
| thyrotropin-releasing hormone | hypothalamus | substantia nigra                         | 2986 | 1690  | 21 |
| thyrotropin-releasing hormone | hypothalamus | periaqueductal                           | 2986 | 1157  | 28 |
| thyrotropin-releasing hormone | dopamine     | Parkinsons disease                       | 1022 | 11323 | 28 |
| thyrotropin-releasing hormone | dopamine     | substantia nigra                         | 1022 | 9657  | 21 |
| thyrotropin-releasing hormone | dopamine     | ventral tegmental area                   | 1022 | 3348  | 9  |
| thyrotropin-releasing hormone | dopamine     | putamen                                  | 1022 | 3443  | 13 |
| thyrotropin-releasing hormone | dopamine     | prefrontal cortex                        | 1022 | 3695  | 6  |
| thyrotropin-releasing hormone | dopamine     | addiction                                | 1022 | 2044  | 6  |
| thyrotropin-releasing hormone | dopamine     | globus pallidus                          | 1022 | 1535  | 14 |
| thyrotropin-releasing hormone | dopamine     | attention deficit hyperactivity disorder | 1022 | 1776  | 24 |
| thyrotropin-releasing hormone | dopamine     | locus ceruleus                           | 1022 | 1221  | 21 |
| thyrotropin-releasing hormone | dopamine     | medial prefrontal cortex                 | 1022 | 1070  | 1  |
| thyroxine                     | hypothalamus | thalamus                                 | 1491 | 5006  | 29 |
| thyroxine                     | hypothalamus | suprachiasmatic nucleus                  | 1491 | 2814  | 6  |
| thyroxine                     | hypothalamus | posterior nucleus of the hypothalamus    | 1491 | 2278  | 7  |
| thyroxine                     | hypothalamus | pons                                     | 1491 | 2065  | 14 |
| thyroxine                     | hypothalamus | basal ganglia                            | 1491 | 2664  | 26 |
| thyroxine                     | hypothalamus | locus ceruleus                           | 1491 | 1814  | 7  |
| thyroxine                     | hypothalamus | raphe nuclei                             | 1491 | 1769  | 8  |
| thyroxine                     | hypothalamus | stria terminalis                         | 1491 | 1673  | 1  |
| thyroxine                     | hypothalamus | stria terminalis                         | 1491 | 1673  | 1  |
| thyroxine                     | hypothalamus | dorsomedial nucleus of the hypothalamus  | 1491 | 1649  | 8  |
| thyroxine                     | hypothalamus | nucleus accumbens                        | 1491 | 1598  | 6  |

|                  |              |                                         |      |      |    |
|------------------|--------------|-----------------------------------------|------|------|----|
| thyroxine        | hypothalamus | substantia nigra                        | 1491 | 1690 | 7  |
| thyroxine        | hypothalamus | neurohypophysis                         | 1491 | 1471 | 29 |
| thyroxine        | hypothalamus | olfactory bulb                          | 1491 | 1494 | 21 |
| thyroxine        | hypothalamus | solitary nucleus                        | 1491 | 1208 | 1  |
| thyroxine        | hypothalamus | periaqueductal                          | 1491 | 1157 | 1  |
| thyroxine        | hypothalamus | caudate nucleus                         | 1491 | 1220 | 7  |
| thyroxine        | hypothalamus | medial dorsal nucleus                   | 1491 | 1052 | 4  |
| thyroxine        | aging        | Parkinsons disease                      | 1040 | 1533 | 13 |
| thyroxine        | aging        | basal ganglia                           | 1040 | 1556 | 26 |
| thyroxine        | aging        | dentate gyrus                           | 1040 | 1014 | 18 |
| triiodothyronine | hypothalamus | thalamus                                | 1037 | 5006 | 13 |
| triiodothyronine | hypothalamus | suprachiasmatic nucleus                 | 1037 | 2814 | 6  |
| triiodothyronine | hypothalamus | posterior nucleus of the hypothalamus   | 1037 | 2278 | 8  |
| triiodothyronine | hypothalamus | pons                                    | 1037 | 2065 | 9  |
| triiodothyronine | hypothalamus | basal ganglia                           | 1037 | 2664 | 30 |
| triiodothyronine | hypothalamus | septum                                  | 1037 | 2354 | 22 |
| triiodothyronine | hypothalamus | locus ceruleus                          | 1037 | 1814 | 7  |
| triiodothyronine | hypothalamus | raphe nuclei                            | 1037 | 1769 | 7  |
| triiodothyronine | hypothalamus | stria terminalis                        | 1037 | 1673 | 0  |
| triiodothyronine | hypothalamus | stria terminalis                        | 1037 | 1673 | 0  |
| triiodothyronine | hypothalamus | dorsomedial nucleus of the hypothalamus | 1037 | 1649 | 9  |
| triiodothyronine | hypothalamus | nucleus accumbens                       | 1037 | 1598 | 6  |
| triiodothyronine | hypothalamus | substantia nigra                        | 1037 | 1690 | 4  |
| triiodothyronine | hypothalamus | neurohypophysis                         | 1037 | 1471 | 16 |
| triiodothyronine | hypothalamus | olfactory bulb                          | 1037 | 1494 | 11 |
| triiodothyronine | hypothalamus | solitary nucleus                        | 1037 | 1208 | 0  |
| triiodothyronine | hypothalamus | periaqueductal                          | 1037 | 1157 | 0  |
| triiodothyronine | hypothalamus | caudate nucleus                         | 1037 | 1220 | 9  |
| triiodothyronine | hypothalamus | medial dorsal nucleus                   | 1037 | 1052 | 2  |
| triiodothyronine | hypothalamus | habenula                                | 1037 | 1297 | 21 |
| triiodothyronine | insulin      | HIV                                     | 2147 | 1329 | 30 |
| tryptophan       | dopamine     | ventral tegmental area                  | 1367 | 3348 | 24 |
| tryptophan       | dopamine     | globus pallidus                         | 1367 | 1535 | 25 |
| tryptophan       | dopamine     | medial prefrontal cortex                | 1367 | 1070 | 19 |
| tryptophan       | glutamate    | dentate gyrus                           | 1232 | 1314 | 20 |
| vasopressin      | diabetes     | HIV                                     | 2876 | 2092 | 29 |
| vasopressin      | insulin      | HIV                                     | 1091 | 1329 | 29 |
| addiction        | dopamine     | adenohypophysis                         | 2044 | 1121 | 6  |
| addiction        | dopamine     | habenula                                | 2044 | 1267 | 29 |
| AIDS             | fear         | amygdala                                | 1827 | 2507 | 14 |
| AIDS             | fear         | panic disorder                          | 1827 | 1436 | 11 |
| alcoholism       | dopamine     | medial prefrontal cortex                | 1346 | 1070 | 21 |
| alcoholism       | dopamine     | habenula                                | 1346 | 1267 | 26 |
| alcoholism       | dementia     | aphasia                                 | 1050 | 1236 | 29 |

|                                 |              |                                         |      |      |    |
|---------------------------------|--------------|-----------------------------------------|------|------|----|
| alcoholism                      | dementia     | Lou Gehrigs disease                     | 1050 | 1061 | 26 |
| alcoholism                      | serotonin    | pineal body                             | 1191 | 1520 | 24 |
| alcoholism                      | serotonin    | habenula                                | 1191 | 1382 | 26 |
| Alzheimers disease              | cerebellum   | dentate nucleus                         | 1253 | 2398 | 27 |
| Alzheimers disease              | cerebellum   | fastigial nucleus                       | 1253 | 1574 | 4  |
| Alzheimers disease              | cerebellum   | vestibular nuclei                       | 1253 | 1311 | 8  |
| Alzheimers disease              | cerebellum   | inferior olive                          | 1253 | 1124 | 6  |
| Alzheimers disease              | cerebellum   | superior colliculus                     | 1253 | 1127 | 23 |
| amnesia                         | hippocampus  | olfactory bulb                          | 1611 | 2197 | 16 |
| amnesia                         | hippocampus  | nucleus accumbens                       | 1611 | 2044 | 23 |
| amnesia                         | hippocampus  | substantia nigra                        | 1611 | 2108 | 19 |
| amnesia                         | hippocampus  | putamen                                 | 1611 | 1890 | 22 |
| amnesia                         | hippocampus  | subiculum                               | 1611 | 1690 | 18 |
| amnesia                         | hippocampus  | raphe nuclei                            | 1611 | 1464 | 8  |
| amnesia                         | hippocampus  | pons                                    | 1611 | 1463 | 13 |
| amnesia                         | hippocampus  | locus ceruleus                          | 1611 | 1223 | 11 |
| amnesia                         | hippocampus  | globus pallidus                         | 1611 | 1092 | 30 |
| amnesia                         | hippocampus  | habenula                                | 1611 | 1105 | 8  |
| anorexia                        | hypothalamus | suprachiasmatic nucleus                 | 1379 | 2814 | 8  |
| anorexia                        | hypothalamus | posterior nucleus of the hypothalamus   | 1379 | 2278 | 4  |
| anorexia                        | hypothalamus | pons                                    | 1379 | 2065 | 28 |
| anorexia                        | hypothalamus | septum                                  | 1379 | 2354 | 25 |
| anorexia                        | hypothalamus | locus ceruleus                          | 1379 | 1814 | 11 |
| anorexia                        | hypothalamus | raphe nuclei                            | 1379 | 1769 | 30 |
| anorexia                        | hypothalamus | stria terminalis                        | 1379 | 1673 | 21 |
| anorexia                        | hypothalamus | stria terminalis                        | 1379 | 1673 | 21 |
| anorexia                        | hypothalamus | dorsomedial nucleus of the hypothalamus | 1379 | 1649 | 20 |
| anorexia                        | hypothalamus | nucleus accumbens                       | 1379 | 1598 | 28 |
| anorexia                        | hypothalamus | substantia nigra                        | 1379 | 1690 | 14 |
| anorexia                        | hypothalamus | neurohypophysis                         | 1379 | 1471 | 13 |
| anorexia                        | hypothalamus | olfactory bulb                          | 1379 | 1494 | 10 |
| anorexia                        | hypothalamus | periaqueductal                          | 1379 | 1157 | 4  |
| anorexia                        | hypothalamus | caudate nucleus                         | 1379 | 1220 | 11 |
| anorexia                        | hypothalamus | pineal body                             | 1379 | 1245 | 17 |
| anorexia                        | hypothalamus | medial dorsal nucleus                   | 1379 | 1052 | 10 |
| anorexia                        | hypothalamus | habenula                                | 1379 | 1297 | 20 |
| antisocial personality disorder | alcoholism   | diabetes                                | 1206 | 3280 | 11 |
| anxiety                         | hippocampus  | subiculum                               | 2338 | 1690 | 18 |
| anxiety                         | hippocampus  | fornix                                  | 2338 | 1261 | 15 |
| anxiety                         | hypothalamus | suprachiasmatic nucleus                 | 1820 | 2814 | 20 |
| anxiety                         | hypothalamus | posterior nucleus of the hypothalamus   | 1820 | 2278 | 14 |
| anxiety                         | hypothalamus | neurohypophysis                         | 1820 | 1471 | 12 |
| anxiety                         | hypothalamus | solitary nucleus                        | 1820 | 1208 | 24 |
| anxiety                         | hypothalamus | medial dorsal nucleus                   | 1820 | 1052 | 14 |



|                                          |                |                                         |      |      |    |
|------------------------------------------|----------------|-----------------------------------------|------|------|----|
| anxiety                                  | rhythm         | suprachiasmatic nucleus                 | 1066 | 3521 | 20 |
| aphasia                                  | dementia       | bipolar disorder                        | 1236 | 1156 | 27 |
| ataxia                                   | cerebellum     | fastigial nucleus                       | 8483 | 1574 | 25 |
| ataxia                                   | cerebellum     | olfactory bulb                          | 8483 | 1667 | 20 |
| ataxia                                   | cerebellum     | superior colliculus                     | 8483 | 1127 | 25 |
| ataxia                                   | cerebellum     | prefrontal cortex                       | 8483 | 1156 | 25 |
| attention deficit hyperactivity disorder | dopamine       | adenohypophysis                         | 1776 | 1121 | 15 |
| attention deficit hyperactivity disorder | sleep          | pons                                    | 1004 | 1017 | 22 |
| bipolar disorder                         | dementia       | Lou Gehrigs disease                     | 1156 | 1061 | 18 |
| bipolar disorder                         | serotonin      | raphe nuclei                            | 1241 | 4534 | 20 |
| bipolar disorder                         | serotonin      | pineal body                             | 1241 | 1520 | 26 |
| bipolar disorder                         | serotonin      | substantia nigra                        | 1241 | 1313 | 20 |
| bipolar disorder                         | serotonin      | habenula                                | 1241 | 1382 | 3  |
| coma                                     | seizure        | amygdala                                | 2208 | 3081 | 17 |
| coma                                     | seizure        | dentate gyrus                           | 2208 | 1568 | 16 |
| dementia                                 | anxiety        | social phobia                           | 1961 | 1828 | 10 |
| dementia                                 | cerebellum     | fastigial nucleus                       | 1591 | 1574 | 5  |
| dementia                                 | cerebellum     | vestibular nuclei                       | 1591 | 1311 | 10 |
| dementia                                 | cerebellum     | inferior olive                          | 1591 | 1124 | 18 |
| dementia                                 | cerebellum     | superior colliculus                     | 1591 | 1127 | 19 |
| dementia                                 | dopamine       | ventral tegmental area                  | 1144 | 3348 | 21 |
| dementia                                 | dopamine       | medial prefrontal cortex                | 1144 | 1070 | 17 |
| dementia                                 | dopamine       | adenohypophysis                         | 1144 | 1121 | 12 |
| diabetes                                 | hypothalamus   | locus ceruleus                          | 2995 | 1814 | 18 |
| diabetes                                 | hypothalamus   | raphe nuclei                            | 2995 | 1769 | 12 |
| diabetes                                 | hypothalamus   | stria terminalis                        | 2995 | 1673 | 8  |
| diabetes                                 | hypothalamus   | stria terminalis                        | 2995 | 1673 | 8  |
| diabetes                                 | hypothalamus   | dorsomedial nucleus of the hypothalamus | 2995 | 1649 | 16 |
| diabetes                                 | hypothalamus   | nucleus accumbens                       | 2995 | 1598 | 18 |
| diabetes                                 | hypothalamus   | olfactory bulb                          | 2995 | 1494 | 25 |
| diabetes                                 | hypothalamus   | solitary nucleus                        | 2995 | 1208 | 26 |
| diabetes                                 | hypothalamus   | periaqueductal                          | 2995 | 1157 | 17 |
| diabetes                                 | hypothalamus   | medial dorsal nucleus                   | 2995 | 1052 | 7  |
| diabetes                                 | glutamate      | nucleus accumbens                       | 2813 | 1184 | 18 |
| diabetes                                 | norepinephrine | locus ceruleus                          | 2186 | 2838 | 18 |
| diabetes                                 | anxiety        | social phobia                           | 1502 | 1828 | 11 |
| diabetes                                 | serotonin      | raphe nuclei                            | 1074 | 4534 | 12 |
| diabetes                                 | serotonin      | nucleus accumbens                       | 1074 | 1570 | 18 |
| epilepsy                                 | amygdala       | stria terminalis                        | 2452 | 1702 | 19 |
| epilepsy                                 | amygdala       | stria terminalis                        | 2452 | 1702 | 19 |
| epilepsy                                 | cerebellum     | fastigial nucleus                       | 2090 | 1574 | 7  |
| epilepsy                                 | cerebellum     | vestibular nuclei                       | 2090 | 1311 | 16 |
| epilepsy                                 | cerebellum     | inferior olive                          | 2090 | 1124 | 12 |
| epilepsy                                 | anxiety        | social phobia                           | 1672 | 1828 | 6  |

|                               |               |                               |      |      |    |
|-------------------------------|---------------|-------------------------------|------|------|----|
| epilepsy                      | rhythm        | suprachiasmatic nucleus       | 1234 | 3521 | 13 |
| HIV                           | fear          | amygdala                      | 1702 | 2507 | 7  |
| HIV                           | fear          | panic disorder                | 1702 | 1436 | 14 |
| HIV                           | anxiety       | panic disorder                | 1061 | 4872 | 14 |
| HIV                           | anxiety       | obsessive compulsive disorder | 1061 | 3476 | 24 |
| HIV                           | anxiety       | social phobia                 | 1061 | 1828 | 8  |
| Huntingtons disease           | striatum      | amygdala                      | 1061 | 1978 | 7  |
| Huntingtons disease           | basal ganglia | olfactory bulb                | 1495 | 1019 | 19 |
| hydrocephalus                 | cerebellum    | basal forebrain nucleus       | 1430 | 1046 | 13 |
| hydrocephalus                 | cerebellum    | dentate nucleus               | 1555 | 2398 | 19 |
| hydrocephalus                 | cerebellum    | fastigial nucleus             | 1555 | 1574 | 0  |
| hydrocephalus                 | cerebellum    | olfactory bulb                | 1555 | 1667 | 12 |
| hydrocephalus                 | cerebellum    | putamen                       | 1555 | 1655 | 17 |
| hydrocephalus                 | cerebellum    | primary motor cortex          | 1555 | 1732 | 26 |
| hydrocephalus                 | cerebellum    | substantia nigra              | 1555 | 1739 | 14 |
| hydrocephalus                 | cerebellum    | vestibular nuclei             | 1555 | 1311 | 6  |
| hydrocephalus                 | cerebellum    | amygdala                      | 1555 | 1582 | 9  |
| hydrocephalus                 | cerebellum    | inferior olive                | 1555 | 1124 | 4  |
| hydrocephalus                 | cerebellum    | globus pallidus               | 1555 | 1188 | 15 |
| hydrocephalus                 | cerebellum    | superior colliculus           | 1555 | 1127 | 15 |
| hydrocephalus                 | cerebellum    | prefrontal cortex             | 1555 | 1156 | 7  |
| hydrocephalus                 | cerebellum    | dentate gyrus                 | 1555 | 1023 | 8  |
| hydrocephalus                 | cerebellum    | habenula                      | 1555 | 1113 | 30 |
| migraine                      | serotonin     | striatum                      | 2943 | 4782 | 16 |
| migraine                      | serotonin     | prefrontal cortex             | 2943 | 1754 | 19 |
| migraine                      | serotonin     | nucleus accumbens             | 2943 | 1570 | 6  |
| migraine                      | serotonin     | amygdala                      | 2943 | 1532 | 19 |
| migraine                      | serotonin     | substantia nigra              | 2943 | 1313 | 16 |
| migraine                      | epilepsy      | amygdala                      | 1481 | 2452 | 19 |
| migraine                      | epilepsy      | dentate gyrus                 | 1481 | 1354 | 3  |
| migraine                      | epilepsy      | corpus callosum               | 1481 | 1024 | 20 |
| multiple sclerosis            | cerebellum    | dentate nucleus               | 1050 | 2398 | 11 |
| multiple sclerosis            | cerebellum    | fastigial nucleus             | 1050 | 1574 | 2  |
| multiple sclerosis            | cerebellum    | olfactory bulb                | 1050 | 1667 | 18 |
| multiple sclerosis            | cerebellum    | vestibular nuclei             | 1050 | 1311 | 20 |
| multiple sclerosis            | cerebellum    | amygdala                      | 1050 | 1582 | 13 |
| multiple sclerosis            | cerebellum    | inferior olive                | 1050 | 1124 | 4  |
| multiple sclerosis            | cerebellum    | superior colliculus           | 1050 | 1127 | 9  |
| multiple sclerosis            | cerebellum    | dentate gyrus                 | 1050 | 1023 | 12 |
| narcolepsy                    | sleep         | hippocampus                   | 2349 | 1851 | 27 |
| narcolepsy                    | sleep         | stroke                        | 2349 | 1299 | 19 |
| obsessive compulsive disorder | serotonin     | raphe nuclei                  | 2023 | 4534 | 18 |
| obsessive compulsive disorder | serotonin     | pineal body                   | 2023 | 1520 | 7  |
| obsessive compulsive disorder | serotonin     | substantia nigra              | 2023 | 1313 | 19 |

|                               |                |                                         |       |      |    |
|-------------------------------|----------------|-----------------------------------------|-------|------|----|
| obsessive compulsive disorder | serotonin      | habenula                                | 2023  | 1382 | 3  |
| Parkinsons disease            | dopamine       | adenohypophysis                         | 11323 | 1121 | 16 |
| Parkinsons disease            | cerebellum     | fastigial nucleus                       | 1004  | 1574 | 8  |
| Parkinsons disease            | cerebellum     | vestibular nuclei                       | 1004  | 1311 | 5  |
| Parkinsons disease            | cerebellum     | inferior olive                          | 1004  | 1124 | 5  |
| seizure                       | amygdala       | stria terminalis                        | 3081  | 1702 | 29 |
| seizure                       | amygdala       | stria terminalis                        | 3081  | 1702 | 29 |
| seizure                       | cerebellum     | fastigial nucleus                       | 2502  | 1574 | 10 |
| seizure                       | cerebellum     | vestibular nuclei                       | 2502  | 1311 | 24 |
| seizure                       | cerebellum     | inferior olive                          | 2502  | 1124 | 18 |
| seizure                       | anxiety        | social phobia                           | 1722  | 1828 | 10 |
| seizure                       | hypothalamus   | adenohypophysis                         | 1157  | 3702 | 28 |
| seizure                       | hypothalamus   | suprachiasmatic nucleus                 | 1157  | 2814 | 8  |
| seizure                       | hypothalamus   | posterior nucleus of the hypothalamus   | 1157  | 2278 | 18 |
| seizure                       | hypothalamus   | stria terminalis                        | 1157  | 1673 | 29 |
| seizure                       | hypothalamus   | stria terminalis                        | 1157  | 1673 | 29 |
| seizure                       | hypothalamus   | dorsomedial nucleus of the hypothalamus | 1157  | 1649 | 16 |
| seizure                       | hypothalamus   | neurohypophysis                         | 1157  | 1471 | 21 |
| seizure                       | hypothalamus   | solitary nucleus                        | 1157  | 1208 | 22 |
| seizure                       | rhythm         | suprachiasmatic nucleus                 | 1063  | 3521 | 8  |
| seizure                       | dopamine       | ventral tegmental area                  | 1152  | 3348 | 20 |
| seizure                       | dopamine       | medial prefrontal cortex                | 1152  | 1070 | 26 |
| seizure                       | dopamine       | adenohypophysis                         | 1152  | 1121 | 28 |
| social phobia                 | anxiety        | hippocampus                             | 1828  | 2338 | 11 |
| social phobia                 | anxiety        | hypothalamus                            | 1828  | 1820 | 14 |
| stroke                        | rhythm         | suprachiasmatic nucleus                 | 2426  | 3521 | 15 |
| stroke                        | cerebellum     | dentate nucleus                         | 1425  | 2398 | 21 |
| stroke                        | cerebellum     | fastigial nucleus                       | 1425  | 1574 | 7  |
| stroke                        | cerebellum     | vestibular nuclei                       | 1425  | 1311 | 14 |
| stroke                        | cerebellum     | inferior olive                          | 1425  | 1124 | 8  |
| stroke                        | cerebellum     | superior colliculus                     | 1425  | 1127 | 13 |
| stroke                        | norepinephrine | locus ceruleus                          | 1527  | 2838 | 21 |
| stroke                        | basal ganglia  | nucleus accumbens                       | 1128  | 2641 | 12 |
| stroke                        | basal ganglia  | basal forebrain nucleus                 | 1128  | 1046 | 12 |
| stroke                        | glutamate      | nucleus accumbens                       | 1166  | 1184 | 12 |
| stroke                        | hippocampus    | entorhinal area                         | 1174  | 4249 | 18 |
| stroke                        | hippocampus    | nucleus accumbens                       | 1174  | 2044 | 12 |
| stroke                        | hippocampus    | subiculum                               | 1174  | 1690 | 2  |
| stroke                        | hippocampus    | raphe nuclei                            | 1174  | 1464 | 21 |
| stroke                        | hippocampus    | fornix                                  | 1174  | 1261 | 4  |
| stroke                        | hippocampus    | locus ceruleus                          | 1174  | 1223 | 21 |
| stroke                        | hippocampus    | parahippocampal gyrus                   | 1174  | 1052 | 15 |
| stroke                        | estrogen       | adenohypophysis                         | 1209  | 1062 | 12 |
| adenohypophysis               | hypothalamus   | raphe nuclei                            | 3702  | 1769 | 29 |

|                                         |              |                          |      |      |    |
|-----------------------------------------|--------------|--------------------------|------|------|----|
| adenohypophysis                         | hypothalamus | substantia nigra         | 3702 | 1690 | 28 |
| adenohypophysis                         | hypothalamus | solitary nucleus         | 3702 | 1208 | 23 |
| adenohypophysis                         | hypothalamus | periaqueductal           | 3702 | 1157 | 14 |
| adenohypophysis                         | hypothalamus | caudate nucleus          | 3702 | 1220 | 27 |
| adenohypophysis                         | hypothalamus | medial dorsal nucleus    | 3702 | 1052 | 27 |
| adenohypophysis                         | dopamine     | substantia nigra         | 1121 | 9657 | 28 |
| adenohypophysis                         | dopamine     | caudate nucleus          | 1121 | 3755 | 27 |
| adenohypophysis                         | dopamine     | ventral tegmental area   | 1121 | 3348 | 9  |
| adenohypophysis                         | dopamine     | putamen                  | 1121 | 3443 | 22 |
| adenohypophysis                         | dopamine     | prefrontal cortex        | 1121 | 3695 | 8  |
| adenohypophysis                         | dopamine     | globus pallidus          | 1121 | 1535 | 14 |
| adenohypophysis                         | dopamine     | medial prefrontal cortex | 1121 | 1070 | 2  |
| caudate nucleus                         | hippocampus  | subiculum                | 1779 | 1690 | 22 |
| caudate nucleus                         | cerebellum   | vestibular nuclei        | 1382 | 1311 | 29 |
| caudate nucleus                         | cerebellum   | inferior olive           | 1382 | 1124 | 25 |
| caudate nucleus                         | hypothalamus | suprachiasmatic nucleus  | 1220 | 2814 | 27 |
| caudate nucleus                         | hypothalamus | neurohypophysis          | 1220 | 1471 | 13 |
| caudate nucleus                         | hypothalamus | solitary nucleus         | 1220 | 1208 | 27 |
| cingulate gyrus                         | hippocampus  | habenula                 | 1008 | 1105 | 24 |
| dentate gyrus                           | cerebellum   | vestibular nuclei        | 1023 | 1311 | 30 |
| dentate gyrus                           | cerebellum   | inferior olive           | 1023 | 1124 | 27 |
| dorsomedial nucleus of the hypothalamus | hypothalamus | neurohypophysis          | 1649 | 1471 | 15 |
| dorsomedial nucleus of the hypothalamus | hypothalamus | pineal body              | 1649 | 1245 | 19 |
| fastigial nucleus                       | cerebellum   | corpus callosum          | 1574 | 1340 | 16 |
| globus pallidus                         | hippocampus  | fornix                   | 1092 | 1261 | 26 |
| globus pallidus                         | hippocampus  | parahippocampal gyrus    | 1092 | 1052 | 20 |
| habenula                                | hippocampus  | parahippocampal gyrus    | 1105 | 1052 | 2  |
| inferior olive                          | cerebellum   | corpus callosum          | 1124 | 1340 | 14 |
| inferior olive                          | cerebellum   | prefrontal cortex        | 1124 | 1156 | 3  |
| locus ceruleus                          | hypothalamus | neurohypophysis          | 1814 | 1471 | 15 |
| locus ceruleus                          | hippocampus  | fornix                   | 1223 | 1261 | 30 |
| locus ceruleus                          | hippocampus  | parahippocampal gyrus    | 1223 | 1052 | 20 |
| medial dorsal nucleus                   | hypothalamus | neurohypophysis          | 1052 | 1471 | 14 |
| medial dorsal nucleus                   | hypothalamus | pineal body              | 1052 | 1245 | 22 |
| neurohypophysis                         | hypothalamus | pons                     | 1471 | 2065 | 28 |
| neurohypophysis                         | hypothalamus | raphe nuclei             | 1471 | 1769 | 19 |
| neurohypophysis                         | hypothalamus | nucleus accumbens        | 1471 | 1598 | 14 |
| neurohypophysis                         | hypothalamus | substantia nigra         | 1471 | 1690 | 21 |
| neurohypophysis                         | hypothalamus | solitary nucleus         | 1471 | 1208 | 30 |
| neurohypophysis                         | hypothalamus | periaqueductal           | 1471 | 1157 | 9  |
| nucleus accumbens                       | hippocampus  | parahippocampal gyrus    | 2044 | 1052 | 20 |
| nucleus accumbens                       | hypothalamus | pineal body              | 1598 | 1245 | 24 |
| nucleus accumbens                       | serotonin    | pineal body              | 1570 | 1520 | 24 |
| olfactory bulb                          | hippocampus  | parahippocampal gyrus    | 2197 | 1052 | 8  |

|                       |              |                         |      |      |    |
|-----------------------|--------------|-------------------------|------|------|----|
| parahippocampal gyrus | hippocampus  | septum                  | 1052 | 3508 | 10 |
| parahippocampal gyrus | hippocampus  | raphe nuclei            | 1052 | 1464 | 9  |
| parahippocampal gyrus | hippocampus  | pons                    | 1052 | 1463 | 30 |
| parahippocampal gyrus | hippocampus  | fornix                  | 1052 | 1261 | 24 |
| periaqueductal        | hypothalamus | pineal body             | 1157 | 1245 | 16 |
| pineal body           | serotonin    | prefrontal cortex       | 1520 | 1754 | 3  |
| pineal body           | hypothalamus | stria terminalis        | 1245 | 1673 | 27 |
| pineal body           | hypothalamus | stria terminalis        | 1245 | 1673 | 27 |
| pons                  | hypothalamus | solitary nucleus        | 1245 | 1208 | 11 |
| pons                  | hippocampus  | suprachiasmatic nucleus | 2065 | 2814 | 30 |
| prefrontal cortex     | cerebellum   | fornix                  | 1463 | 1261 | 25 |
| putamen               | hippocampus  | vestibular nuclei       | 1156 | 1311 | 11 |
| raphe nuclei          | hippocampus  | fornix                  | 1890 | 1261 | 30 |
| subiculum             | hippocampus  | corpus callosum         | 1464 | 1182 | 30 |
| substantia nigra      | hippocampus  | corpus callosum         | 1690 | 1182 | 26 |
| vestibular nuclei     | cerebellum   | fornix                  | 2108 | 1261 | 27 |
|                       |              | corpus callosum         | 1311 | 1340 | 8  |
