# Supplementary material
Source: PubMed Central journal article supplement (PMC3376233)

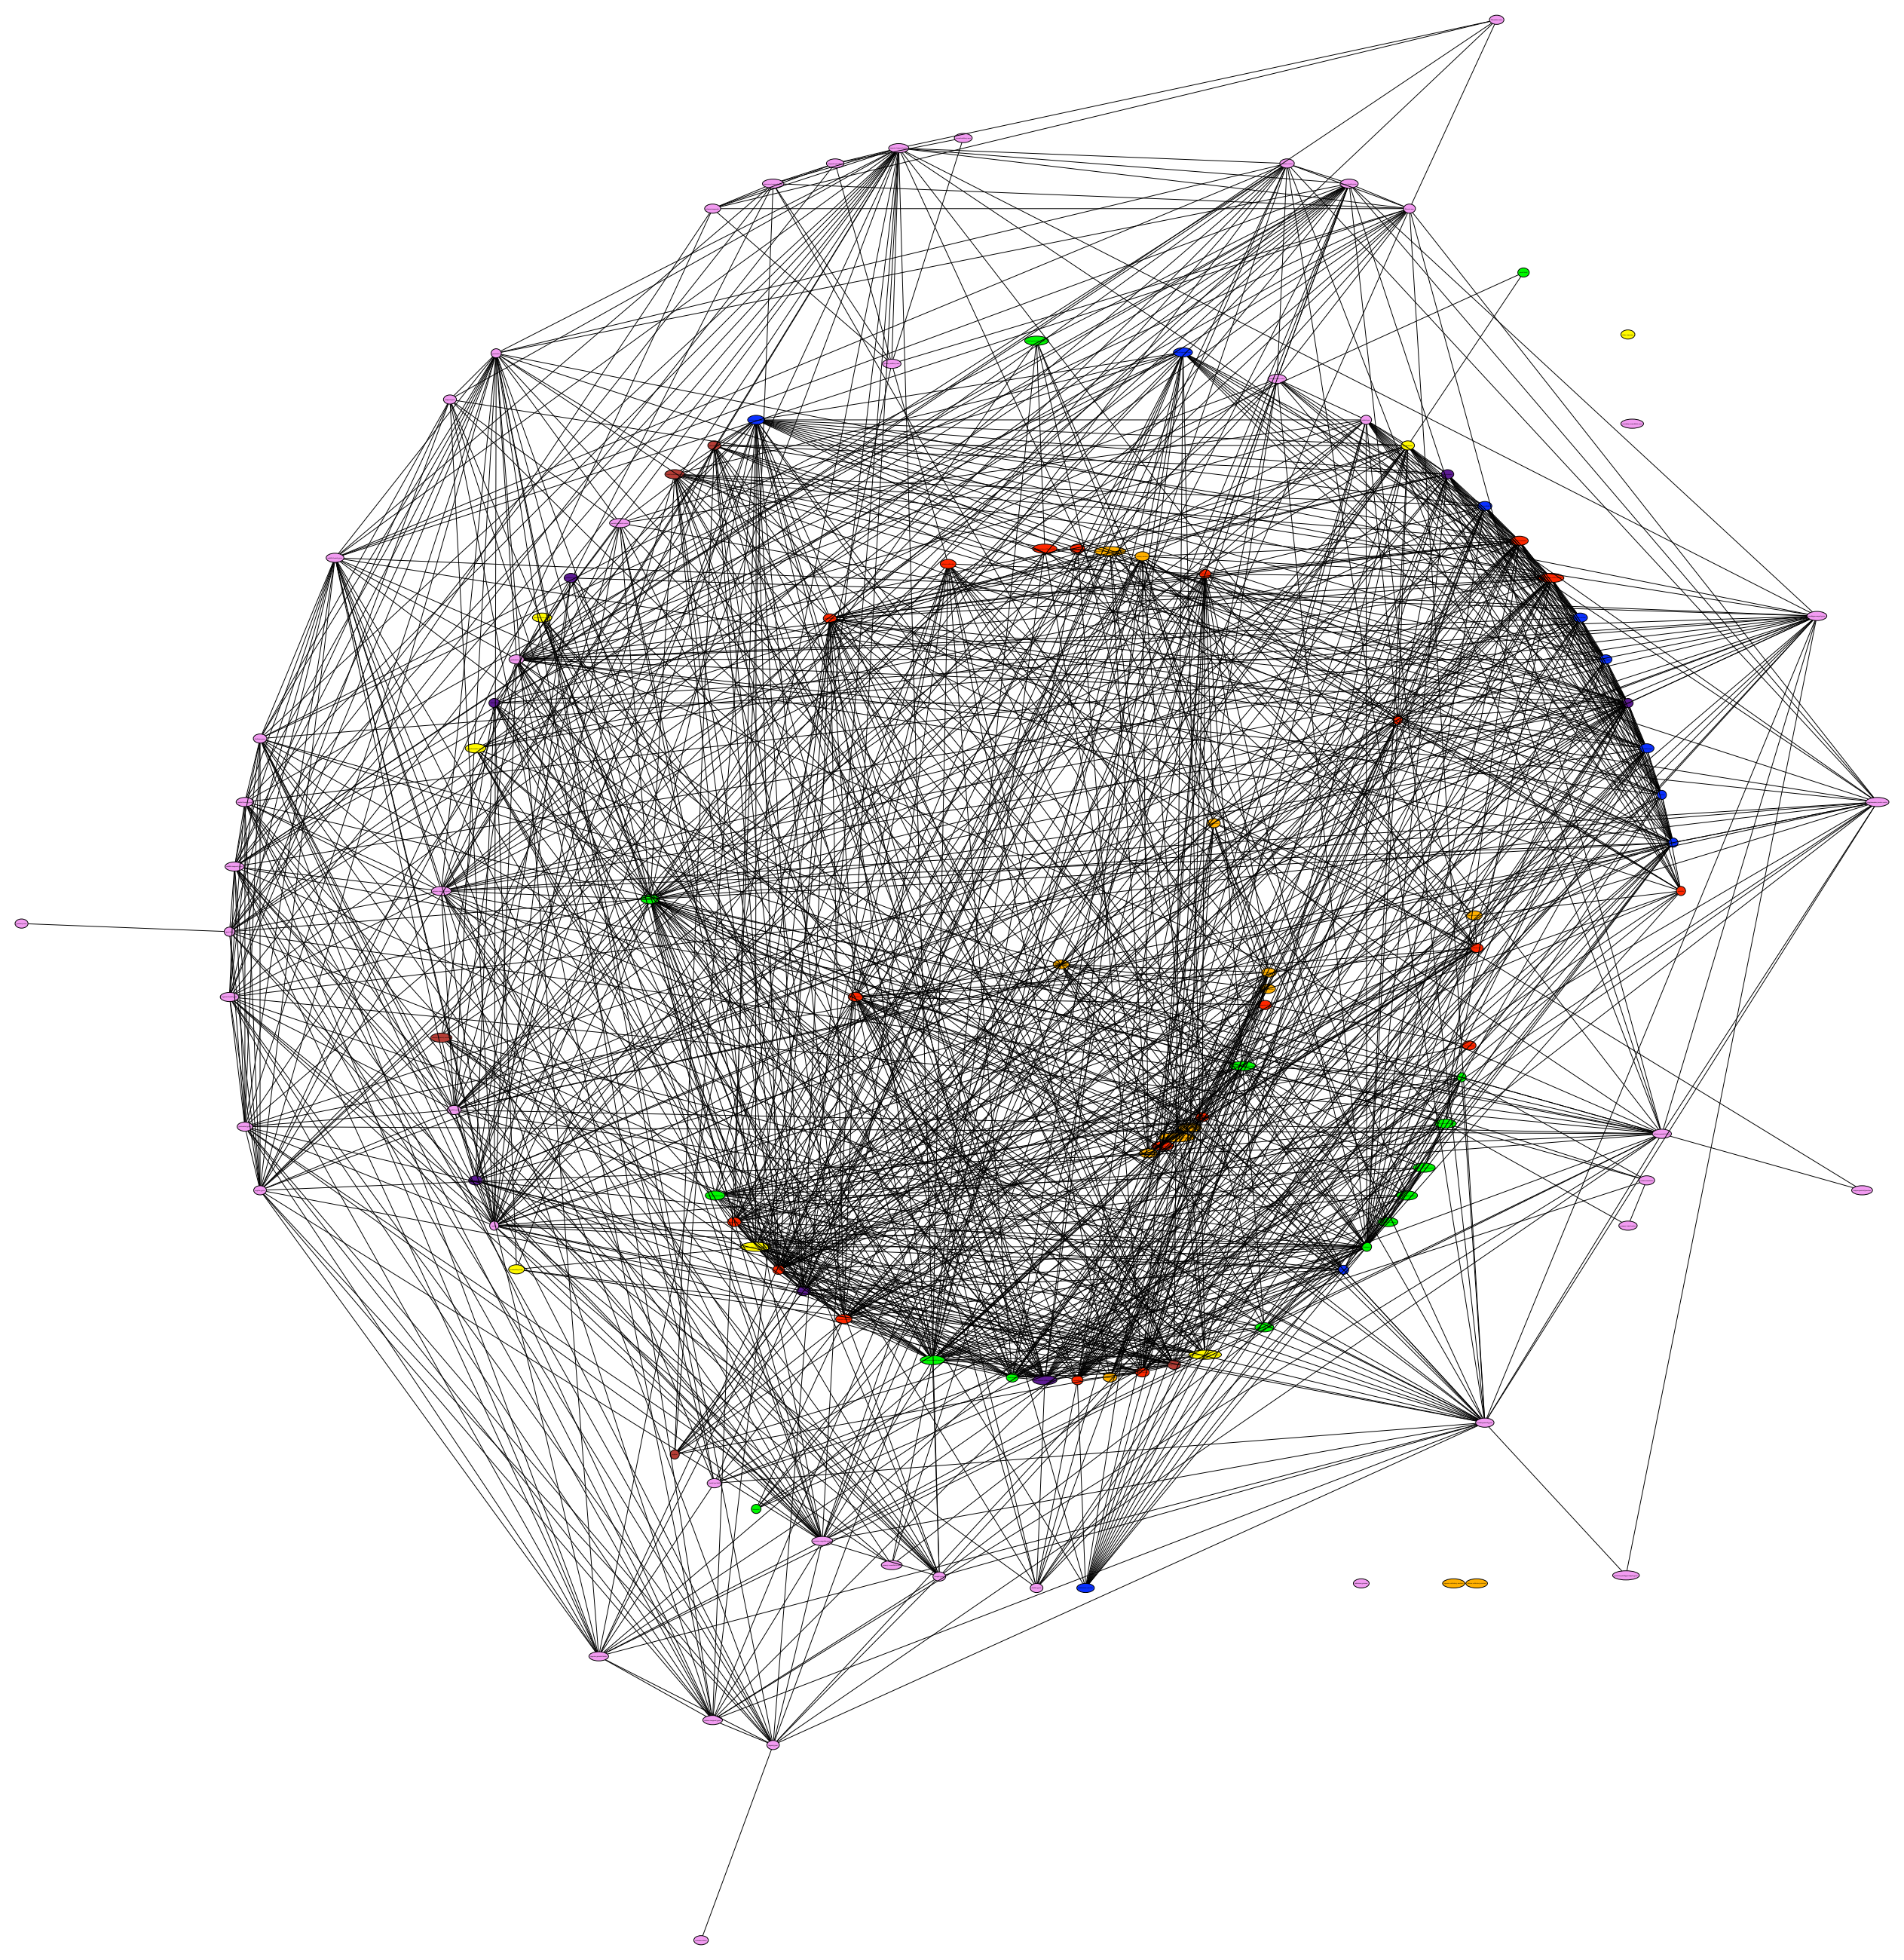

Supplement: NIHMS376884-supplement-03.pdf [file NIHMS376884-supplement-03.pdf]

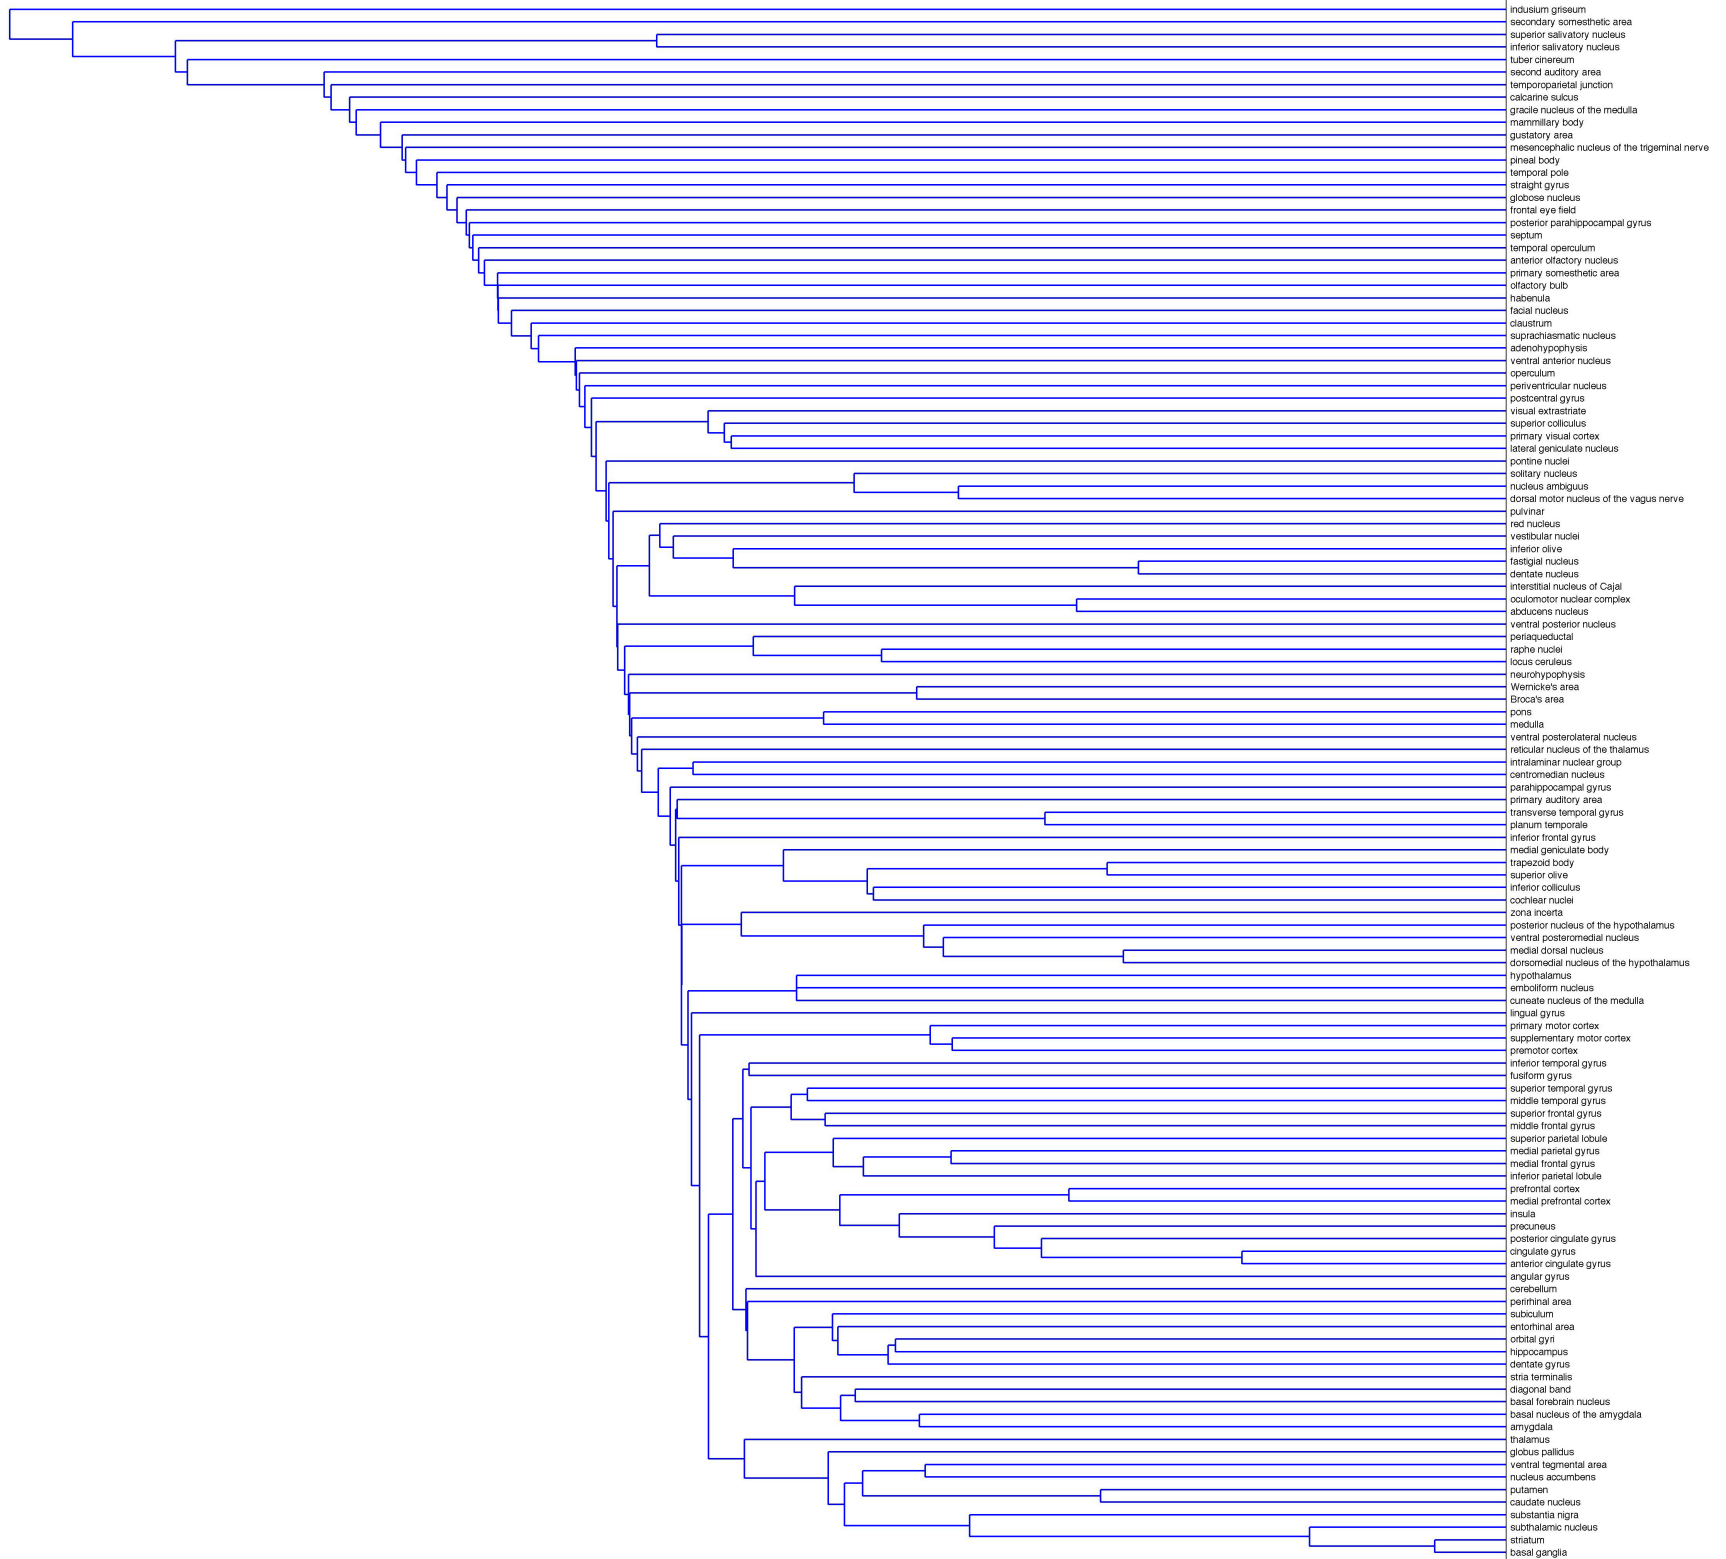

Supplement: NIHMS376884-supplement-04.pdf [file NIHMS376884-supplement-04.pdf]
